# Supplementary material for: A study protocol for an mHealth, multi-centre randomized control trial to promote use of postpartum contraception amongst rural women in Punjab, Pakistan
Source: Springer Nature journal article supplement (doi:10.1186/s12884-019-2427-z), 2019-08-08
Supplement: MOESM3 [file 17050472]

Using mhealth for promoting use of postpartum contraception (PPIUCD study)

سیکشن ایک: سماجی و معاشی حیثیت

| نمبر                                                               | سوالات                                                                           | جوابات                                                                                                                                                                                                                                                                               | ترتیب |
|--------------------------------------------------------------------|----------------------------------------------------------------------------------|--------------------------------------------------------------------------------------------------------------------------------------------------------------------------------------------------------------------------------------------------------------------------------------|-------|
| موجودہ وقت نوٹ کریں                                                |                                                                                  |                                                                                                                                                                                                                                                                                      |       |
| گھنٹے                                                              |                                                                                  |                                                                                                                                                                                                                                                                                      |       |
| منٹ                                                                |                                                                                  |                                                                                                                                                                                                                                                                                      |       |
| سب سے پہلے میں آپ کے اور آپ کے شوہر کے بارے میں چند سوالات کرونگی۔ |                                                                                  |                                                                                                                                                                                                                                                                                      |       |
| 101                                                                | آپ کی عمر کتنی ہے (سالوں میں)؟                                                   | سال                                                                                                                                                                                                                                                                                  |       |
| 102                                                                | آپ کے شوہر کی عمر کتنی ہے (سالوں میں)؟                                           | سال                                                                                                                                                                                                                                                                                  |       |
| 103                                                                | شادی کے وقت آپ کی عمر کتنی تھی؟                                                  | سال                                                                                                                                                                                                                                                                                  |       |
| 104                                                                | آپ نے زیادہ سے زیادہ کہاں تک تعلیم حاصل کی ہے؟                                   | [1] غیر تعلیم یافتہ [لکھ پڑ نہیں سکتی]<br>[2] سادہ جملہ لکھ اور پڑھ سکتی ہیں اور نمبر یار قم کو جمع کر سکتی ہیں<br>[3] پرائمری [1 سے 5 جماعت]<br>[4] مڈل [6 سے 8 جماعت]<br>[5] سیکنڈری [8 سے 10 جماعت]<br>[6] انٹر [11 سے 12 جماعت]<br>[7] گریجویٹیشن یا زیادہ [13 سے زیادہ جماعتیں] |       |
| 105                                                                | آپ کے شوہر نے زیادہ سے زیادہ کہاں تک تعلیم حاصل کی ہے؟                           | [1] غیر تعلیم یافتہ [لکھ پڑ نہیں سکتے]<br>[2] سادہ جملہ لکھ اور پڑھ سکتے ہیں اور نمبر یار قم کو جمع کر سکتے ہیں<br>[3] پرائمری [1 سے 5 جماعت]<br>[4] مڈل [6 سے 8 جماعت]<br>[5] سیکنڈری [8 سے 10 جماعت]<br>[6] انٹر [11 سے 12 جماعت]<br>[7] گریجویٹیشن یا زیادہ [13 سے زیادہ جماعتیں] |       |
| 106                                                                | آپ کا پیشہ کیا ہے، یعنی آپ گھریلو آمدنی کے لیے آپ کیا کام کرتی ہیں؟              | [1] گھریلو خاتون<br>[2] زراعت / کھیتی باڑی<br>[3] دکان داری<br>[4] درزی کام<br>[5] رٹائرڈ<br>[6] طالب علم<br>دیگر وضاحت کریں                                                                                                                                                         |       |
| 107                                                                | آپ کے شوہر کا پیشہ کیا ہے، یعنی آپ کے شوہر گھریلو آمدنی کے لیے کیا کام کرتے ہیں؟ | [1] بے روزگار<br>[2] زراعت / کھیتی باڑی<br>[3] دکان داری<br>[4] درزی کام<br>[5] رٹائرڈ<br>[6] طالب علم<br>دیگر وضاحت کریں                                                                                                                                                            |       |

|                                                                                                                                      |  |                                                                                             |                                                                                                                                                                                                                         |     |
|--------------------------------------------------------------------------------------------------------------------------------------|--|---------------------------------------------------------------------------------------------|-------------------------------------------------------------------------------------------------------------------------------------------------------------------------------------------------------------------------|-----|
|                                                                                                                                      |  | [1] مشترکہ خاندان<br>[2] انفرادی خاندان                                                     | کیا آپ لوگ (شوہر اور بچے) اس گھرانے میں اپنے سسرال والوں کے ساتھ رہتے ہیں یا علیحدہ رہتے ہیں؟                                                                                                                           | 108 |
| <b>سیکشن دو: تولیدی صحت</b>                                                                                                          |  |                                                                                             |                                                                                                                                                                                                                         |     |
| اب میں آپ سے پوری زندگی میں ہونے والے تمام حمل کے بارے میں پوچھنا چاہو گی۔ اس سے میری مراد یہ ہے کہ وہ تمام بچے جن کو آپ نے جنم دیا۔ |  |                                                                                             |                                                                                                                                                                                                                         |     |
| اگر 1 تو<br>205 پوچھیں                                                                                                               |  | حمل کی تعداد                                                                                | آپ زندگی میں کتنی مرتبہ حاملہ ہوئی ہیں؟ (موجودہ حمل کو شامل کر کے بتائیے)                                                                                                                                               | 201 |
| 204 پوچھیں                                                                                                                           |  | [1] ہاں<br>[2] نہیں                                                                         | خواتین کو بعض اوقات ایسے حمل بھی ہوتے ہیں جن کے نتیجے میں زندہ بچہ پیدا نہیں ہوتا۔ یعنی حمل ضائع ہو سکتا ہے، گرویا جاسکتا ہے یا بچہ مردہ پیدا ہو سکتا ہے۔<br>کیا آپ کو کبھی ایسا حمل ہوا جس میں زندہ پیدائش نہ ہوئی ہو؟ | 202 |
|                                                                                                                                      |  | تعداد                                                                                       | آپ کو کتنے حمل ہوئے جس کے نتیجے میں زندہ پیدائش نہ ہوئی ہو؟                                                                                                                                                             | 203 |
|                                                                                                                                      |  | لڑکے لڑکیاں                                                                                 | آپ کے کتنے بچے ہیں جو حیات ہیں؟                                                                                                                                                                                         | 204 |
|                                                                                                                                      |  | [1] اُس وقت حمل چاہتی تھی<br>[2] بعد میں حمل چاہتی تھی<br>[3] مزید بچے بالکل نہیں چاہتی تھی | جب آپ اس دفعہ حاملہ ہوئی، تو کیا آپ اُس وقت حاملہ ہونا چاہتی تھیں، یا آپ بعد میں حمل چاہتی تھیں، یا آپ مزید بچے بالکل نہیں چاہتی تھیں؟                                                                                  | 205 |
|                                                                                                                                      |  | سال<br>مہینے                                                                                | اس بچے کی پیدائش کے بعد، آپ اگلے بچے کے لیے کتنا انتظار کرنا چاہیں گی؟                                                                                                                                                  | 206 |
|                                                                                                                                      |  | سال<br>مہینے                                                                                | اس بچے کی پیدائش کے بعد، آپ کے شوہر اگلے بچے کے لیے کتنا انتظار کرنا چاہیں گے؟                                                                                                                                          | 207 |
|                                                                                                                                      |  | [0] مزید بچے نہیں چاہتے<br>[98] معلوم نہیں                                                  |                                                                                                                                                                                                                         |     |
|                                                                                                                                      |  | [1] زندہ پیدائش<br>[2] مردہ پیدائش<br>[3] حمل کا ضائع ہونا<br>[4] اسقاط حمل                 | [سوال نمبر 201 چیک کریں۔ اگر حمل کی تعداد ایک سے زیادہ ہے تو یہ سوال پوچھیں، ورنہ سوال 210 پوچھیں]<br>آپ کے آخری حمل کا کیا نتیجہ تھا؟                                                                                  | 208 |
|                                                                                                                                      |  | دن<br>مہینے<br>سال                                                                          | [سوال نمبر 201 چیک کریں۔ اگر حمل کی تعداد ایک سے زیادہ ہے تو یہ سوال پوچھیں، ورنہ سوال 210 پوچھیں]<br>آپ کا آخری حمل کتنے عرصہ پہلے اختتام ہوا تھا؟                                                                     | 209 |
|                                                                                                                                      |  | سال<br>مہینے                                                                                | [سوال نمبر 204 چیک کریں۔ اگر خاتون کا کم سے کم ایک زندہ بچہ ہو تو یہ سوال پوچھیں، ورنہ اگلے سیکشن 3 پر جائیں]<br>آپ کے سب سے چھوٹے بچے کی عمر کتنی ہے؟                                                                  | 210 |

|  |  |                         |                                                                             |     |
|--|--|-------------------------|-----------------------------------------------------------------------------|-----|
|  |  | سال                     | سوال 210 میں جس بچے کی عمر بتائی ہے اس کا نام پوچھیں اور یہاں درج کریں: نام | 211 |
|  |  | مہینے                   | [بچے کا نام لیں] سے جو بڑا بچہ ہے اس کی عمر کیا ہے؟                         |     |
|  |  | [1] ایک ہی بچہ / بچی ہے |                                                                             |     |

### سیکشن تین: صحت کے حوالے سے آگاہی

اب میں آپ سے چند سوالوں کے ذریعے یہ جاننا چاہوں گی کہ حمل، بچے کی پیدائش اور پیدا ہونے والے بچے کی صحت کے حوالے سے کن باتوں کا خیال رکھنا چاہیے۔

|  |                                                                                                                                                                                                                                                                                                                                                                                                                                                                                                                                                                                                        |                                                                                                                                                                                   |     |
|--|--------------------------------------------------------------------------------------------------------------------------------------------------------------------------------------------------------------------------------------------------------------------------------------------------------------------------------------------------------------------------------------------------------------------------------------------------------------------------------------------------------------------------------------------------------------------------------------------------------|-----------------------------------------------------------------------------------------------------------------------------------------------------------------------------------|-----|
|  | <p>[1] زچگی کے لئے، صحت کے مرکز کے بارے میں پہلے سے معلومات</p> <p>[2] زچگی کے لئے، تربیت یافتہ صحت کے فرد کے بارے میں پہلے سے معلومات</p> <p>[3] حاملہ عورت کو صحت کے مرکز پر لے جانے کے لئے گاڑی کا پہلے سے انتظام</p> <p>[4] گاڑی کے انتظام اور زچگی کے لئے ہونے والے اخراجات کے لئے رقم کا انتظام</p> <p>[5] زچگی یا اس سلسلے میں ہونے والے درد کے دوران ممکنہ طور پر پیدا ہونے والی ہنگامی صورت کے لیے خون کا پہلے سے انتظام</p> <p>[6] حمل کے دوران تربیت یافتہ صحت کے فرد سے معائنہ کروانا</p> <p>[98] معلوم نہیں</p> <p>دیگر وضاحت کریں:</p> <p>الف: _____</p> <p>ب: _____</p> <p>ج: _____</p> | <p>کیا آپ ہمیں بتائیں گی، بچے کی پیدائش کے لیے کیا ضروری انتظامات پہلے سے کرنے چاہیے؟</p> <p>کریڈیں: اور کچھ؟ [ایک سے زیادہ جوابات ممکن ہیں]</p>                                  | 301 |
|  | <p>[1] سانس لینے میں مشکل پیش آنا</p> <p>[2] شرم گاہ سے خون آنا</p> <p>[3] بل پڑنا، جھٹکے لگنا یا دورے پڑنا یا بے ہوش ہو جانا / سر میں شدید درد ہونا / دُھندلا نظر آنا</p> <p>[4] پیٹ میں شدید درد ہونا</p> <p>[5] شرم گاہ سے غیر معمولی بدبو دار پانی کا آنا</p> <p>[6] پیٹ میں بچے کی حرکت میں کمی آنا یا حرکت کا بالکل نہ ہونا</p> <p>[98] معلوم نہیں</p> <p>دیگر وضاحت کریں:</p> <p>الف: _____</p> <p>ب: _____</p> <p>ج: _____</p>                                                                                                                                                                 | <p>حمل کے دوران خطرے کی کون سی علامات ہو سکتی ہیں جن کے سلسلے میں صحت کے فرد (مثلاً ڈاکٹر) کی فوری ضرورت پیش آسکتی ہے؟</p> <p>کریڈیں: اور کچھ؟ [ایک سے زیادہ جوابات ممکن ہیں]</p> | 302 |

|  |                                                                                                                                                                                                                                                                                                                                                                                                                                                                                                |                                                                                                                                                                                                               |     |
|--|------------------------------------------------------------------------------------------------------------------------------------------------------------------------------------------------------------------------------------------------------------------------------------------------------------------------------------------------------------------------------------------------------------------------------------------------------------------------------------------------|---------------------------------------------------------------------------------------------------------------------------------------------------------------------------------------------------------------|-----|
|  | <p>تعداد <input type="text"/> <input type="text"/></p> <p>[98] معلوم نہیں</p>                                                                                                                                                                                                                                                                                                                                                                                                                  | <p>آپ کے خیال میں دوران حمل کم از کم کتنی بار معائنہ کروانا چاہیے؟</p>                                                                                                                                        | 303 |
|  | <p>[1] پہلی سہ ماہی (1 سے 3 ماہ کا حمل)</p> <p>[2] دوسری سہ ماہی (4 سے 6 ماہ کا حمل)</p> <p>[3] تیسری سہ ماہی (7 سے حمل کا آخری مہینہ)</p> <p>[98] معلوم نہیں</p>                                                                                                                                                                                                                                                                                                                              | <p>حمل کا پہلا معائنہ کب کروانا چاہیے؟</p>                                                                                                                                                                    | 304 |
|  | <p>تعداد <input type="text"/> <input type="text"/></p> <p>[98] معلوم نہیں</p>                                                                                                                                                                                                                                                                                                                                                                                                                  | <p>حمل کے دوران تشنج سے بچاؤ کے لیے کتنے حفاظتی ٹیکہ ٹیکے لگوانے چاہیے؟</p>                                                                                                                                   | 305 |
|  | <p>[1] شرم گاہ سے خون آنا</p> <p>[2] سانس لینے میں مشکل پیش آنا</p> <p>[3] بخار ہونا</p> <p>[4] پیٹ میں درد ہونا</p> <p>[5] سر میں شدید درد ہونا / دُھندلا نظر آنا</p> <p>[6] بل پڑنا، جھٹکے لگنا یا دورے پڑنا یا بے ہوش ہو جانا</p> <p>[7] شرم گاہ سے غیر معمولی بدبو دار پانی کا آنا</p> <p>[8] ایسی کیفیت یا خیالات آنا جن سے یہ ظاہر ہو کہ ماں خود کو یا اپنے بچے کو نقصان پہنچائے گی</p> <p>[98] معلوم نہیں</p> <p>دیگر وضاحت کریں:</p> <p>الف: _____</p> <p>ب: _____</p> <p>ج: _____</p> | <p>بچے کی پیدائش کے بعد چھ ہفتوں کے عرصے میں، ماں کے لیے خطرے کی کون سی علامات ہو سکتی ہیں جن کے سلسلے میں ڈاکٹر وغیرہ کی فوری ضرورت پیش آسکتی ہے؟</p> <p>کریدیں: اور کچھ؟ [ایک سے زیادہ جوابات ممکن ہیں]</p> | 306 |
|  | <p>تعداد <input type="text"/> <input type="text"/></p> <p>[98] معلوم نہیں</p>                                                                                                                                                                                                                                                                                                                                                                                                                  | <p>آپ کے خیال میں بچے کی پیدائش کے بعد کتنی مرتبہ ماں اور بچے کا معائنہ کروانا چاہیے؟</p>                                                                                                                     | 307 |
|  | <p>[1] سانس لینے میں مشکل پیش آنا</p> <p>[2] بل پڑنا، جھٹکے لگنا یا دورے پڑنا یا بے ہوش ہو جانا</p> <p>[3] جلد اور منہ کی جھلیوں کا رنگ نیلا ہو جانا</p> <p>[4] رنگت کا زرد (پھیلا) ہو جانا</p> <p>[5] سستی / کاہلی</p> <p>[6] جلد اور منہ کی جھلیوں کا رنگ نیلا ہو جانا</p> <p>[7] چھوٹے پر جسم گرم محسوس ہونا (بخار)</p> <p>[8] خون کا اخراج ہونا</p>                                                                                                                                        | <p>پیدائش کے بعد چھ ہفتوں کے عرصے میں، بچے کے لیے خطرے کی کون سی علامات ہو سکتی ہیں جن کے سلسلے میں، ڈاکٹر وغیرہ کی فوری ضرورت پیش آسکتی ہے؟</p> <p>کریدیں: اور کچھ؟ [ایک سے زیادہ جوابات ممکن ہیں]</p>       | 308 |

|                                                                                                                                                        |                                                                                                                                                                                                                                                                                                                                                                                                                         |                                                                                                    |  |                                                                                |  |  |  |                                                                                                            |
|--------------------------------------------------------------------------------------------------------------------------------------------------------|-------------------------------------------------------------------------------------------------------------------------------------------------------------------------------------------------------------------------------------------------------------------------------------------------------------------------------------------------------------------------------------------------------------------------|----------------------------------------------------------------------------------------------------|--|--------------------------------------------------------------------------------|--|--|--|------------------------------------------------------------------------------------------------------------|
|                                                                                                                                                        | <p>[9] شدید یرقان (بیلیا / جلد اور آنکھوں کا رنگ پیلا ہو جاتا ہے)</p> <p>[10] بچہ دودھ نہیں پیتا یا بہت کم پیتا ہے</p> <p>[11] دست ہونا</p> <p>[12] مستقل طور پر اُلٹیاں ہونا یا پیٹ کا پھول جانا</p> <p>[13] ناف میں پس پڑ جانا یا، آنکھوں یا جلد کا سرخ ہو جانا</p> <p>[14] ہاتھوں، ناگوں یا جوڑوں میں سوجن ہونا</p> <p>[98] معلوم نہیں</p> <p>دیگر وضاحت کریں:</p> <p>الف: _____</p> <p>ب: _____</p> <p>ج: _____</p> |                                                                                                    |  |                                                                                |  |  |  |                                                                                                            |
|                                                                                                                                                        | <p>[1] بچے کو گرم کپڑے میں لپیٹنا چاہیے</p> <p>[2] بچے کو ماں کی برہنہ چھاتی کے ساتھ لگانا چاہیے</p> <p>[98] معلوم نہیں</p> <p>دیگر وضاحت کریں: _____</p>                                                                                                                                                                                                                                                               | <p>309</p> <p>پیدائش کے فوراً بعد بچے کو گرم رکھنے کے لیے کیا کرنا چاہیے؟</p>                      |  |                                                                                |  |  |  |                                                                                                            |
|                                                                                                                                                        | <table border="1" data-bbox="407 911 561 1077"> <tr><td></td><td></td></tr> <tr><td></td><td></td></tr> <tr><td></td><td></td></tr> </table> <p>منٹ</p> <p>گھنٹے</p> <p>دن</p> <p>[0] فوراً</p> <p>[98] معلوم نہیں</p>                                                                                                                                                                                                  |                                                                                                    |  |                                                                                |  |  |  | <p>310</p> <p>پیدائش کے بعد بچے کو ماں کا دودھ کب سے پلانا چاہیے؟</p>                                      |
|                                                                                                                                                        |                                                                                                                                                                                                                                                                                                                                                                                                                         |                                                                                                    |  |                                                                                |  |  |  |                                                                                                            |
|                                                                                                                                                        |                                                                                                                                                                                                                                                                                                                                                                                                                         |                                                                                                    |  |                                                                                |  |  |  |                                                                                                            |
|                                                                                                                                                        |                                                                                                                                                                                                                                                                                                                                                                                                                         |                                                                                                    |  |                                                                                |  |  |  |                                                                                                            |
|                                                                                                                                                        | <table border="1" data-bbox="415 1188 570 1245"> <tr><td></td><td></td></tr> </table> <p>بچے کی عمر مہینوں میں</p> <p>[98] معلوم نہیں</p>                                                                                                                                                                                                                                                                               |                                                                                                    |  | <p>311</p> <p>کس عمر تک بچے کو صرف اور صرف ماں کا دودھ پلانا چاہیے؟</p>        |  |  |  |                                                                                                            |
|                                                                                                                                                        |                                                                                                                                                                                                                                                                                                                                                                                                                         |                                                                                                    |  |                                                                                |  |  |  |                                                                                                            |
|                                                                                                                                                        | <table border="1" data-bbox="407 1306 561 1472"> <tr><td></td><td></td></tr> <tr><td></td><td></td></tr> <tr><td></td><td></td></tr> </table> <p>منٹ</p> <p>گھنٹے</p> <p>دن</p> <p>[0] پیدائش کے فوری بعد</p> <p>[98] معلوم نہیں</p>                                                                                                                                                                                    |                                                                                                    |  |                                                                                |  |  |  | <p>312</p> <p>یہ بتائیے، پیدائش کے بعد بچے کو بیماریوں سے بچاؤ کے لیے پہلا حفاظتی ٹیکہ کب لگانا چاہیے؟</p> |
|                                                                                                                                                        |                                                                                                                                                                                                                                                                                                                                                                                                                         |                                                                                                    |  |                                                                                |  |  |  |                                                                                                            |
|                                                                                                                                                        |                                                                                                                                                                                                                                                                                                                                                                                                                         |                                                                                                    |  |                                                                                |  |  |  |                                                                                                            |
|                                                                                                                                                        |                                                                                                                                                                                                                                                                                                                                                                                                                         |                                                                                                    |  |                                                                                |  |  |  |                                                                                                            |
| <p>سیکشن چار: حمل، بچے کی پیدائش اور اس کے بعد کی دیکھ بھال</p>                                                                                        |                                                                                                                                                                                                                                                                                                                                                                                                                         |                                                                                                    |  |                                                                                |  |  |  |                                                                                                            |
| <p>اب میں آپ سے دیکھ بھال کے بارے میں جاننا چاہوں گی جو آپ نے (نام) کے وقت حمل کے دوران، (نام) کی پیدائش اور اسکے بعد 42 دنوں کے عرصے میں حاصل کی۔</p> |                                                                                                                                                                                                                                                                                                                                                                                                                         |                                                                                                    |  |                                                                                |  |  |  |                                                                                                            |
| <p>405 پوچھیں ←</p>                                                                                                                                    | <p>[1] ہاں</p> <p>[2] نہیں</p>                                                                                                                                                                                                                                                                                                                                                                                          | <p>401</p> <p>کیا آپ گزشتہ حمل کے دوران حمل کی دیکھ بھال یا معائنے کے لیے کسی کے پاس گئی تھیں؟</p> |  |                                                                                |  |  |  |                                                                                                            |
|                                                                                                                                                        | <table border="1" data-bbox="407 1799 561 1856"> <tr><td></td><td></td></tr> </table> <p>تعداد</p> <p>[98] معلوم نہیں</p>                                                                                                                                                                                                                                                                                               |                                                                                                    |  | <p>402</p> <p>اُس حمل کے دوران آپ نے کتنی بار اپنا چیک اپ / معائنہ کروایا؟</p> |  |  |  |                                                                                                            |
|                                                                                                                                                        |                                                                                                                                                                                                                                                                                                                                                                                                                         |                                                                                                    |  |                                                                                |  |  |  |                                                                                                            |

|                     |                                                                                                                                                                                                                                                                                                     |                                                                                                                                                                                                                                                                                                                              |            |
|---------------------|-----------------------------------------------------------------------------------------------------------------------------------------------------------------------------------------------------------------------------------------------------------------------------------------------------|------------------------------------------------------------------------------------------------------------------------------------------------------------------------------------------------------------------------------------------------------------------------------------------------------------------------------|------------|
|                     | <p>[1] اپنے گھر میں<br/>[2] کسی اور کے گھر میں<br/>[3] سرکاری ہسپتال<br/>[4] دیہی مرکز صحت<br/>[5] بنیادی مرکز صحت<br/>[6] ڈسپنسری<br/>[7] زچہ بچہ سنٹر<br/>[8] فلاحی مرکز / فیملی ویلفیئر سنٹر<br/>[9] نجی ہسپتال یا کلینک<br/>[10] ہومیو پیتھ کا کلینک<br/>[11] سورج سنٹر<br/>دیگر وضاحت کریں</p> | <p>گزشتہ حمل کے دوران چیک اپ یا معائنہ کہاں سے کروایا تھا؟</p>                                                                                                                                                                                                                                                               | <p>403</p> |
|                     | <p>[1] ڈاکٹر<br/>[2] نرس<br/>[3] میڈوائف<br/>[4] لیڈی ہیلتھ وزیٹر<br/>[5] لیڈی ہیلتھ ورکر<br/>[6] حکیم / ہومیو پیتھک ڈاکٹر<br/>[7] ڈسپنسری / کمپوڈر<br/>[8] غیر تربیت یافتہ دائی<br/>دیگر وضاحت کریں</p>                                                                                            | <p>گزشتہ حمل کے دوران چیک اپ / معائنہ کے لیے آپ کس کے پاس گئیں تھیں یعنی آپ کا معائنہ کس نے کیا تھا؟</p>                                                                                                                                                                                                                     | <p>404</p> |
|                     | <p>[1] اپنے گھر میں<br/>[2] کسی اور کے گھر میں<br/>[3] سرکاری ہسپتال<br/>[4] دیہی مرکز صحت<br/>[5] بنیادی مرکز صحت<br/>[6] زچہ بچہ سنٹر<br/>[7] نجی ہسپتال یا کلینک<br/>[8] ہومیو پیتھ کا کلینک<br/>[9] سورج سنٹر<br/>دیگر وضاحت کریں</p>                                                           | <p>نوٹ 1: خاتون سے سب سے چھوٹے بچے کا نام پوچھیں یا آخری پیدا ہونے والے بچے کا نام پوچھیں اور نام لیکر سوال کریں۔<br/>[بچے کا نام] کی پیدائش کہاں ہوئی تھی؟<br/>نوٹ 2: اگر خاتون کی گزشتہ زچگی میں بچے کی فونگی ہو گئی تھی یا بچہ بعد میں فوت ہو گیا تھا تو یہ سوال کریں۔<br/>فوت ہونے والے بچے کی پیدائش کہاں ہوئی تھی؟</p> | <p>405</p> |
|                     | <p>[1] ہاں<br/>[2] نہیں</p>                                                                                                                                                                                                                                                                         | <p>[بچے کا نام] کی پیدائش بڑے آپریشن کے ذریعے ہوئی تھی جس میں پیٹ کاٹ کر بچہ باہر نکال لیتے ہیں؟</p>                                                                                                                                                                                                                         | <p>406</p> |
|                     | <p>[1] خود سے زچگی ہوئی<br/>[2] ڈاکٹر<br/>[3] نرس<br/>[4] میڈوائف<br/>[5] لیڈی ہیلتھ وزیٹر<br/>[6] غیر تربیت یافتہ دائی<br/>[7] فیملی ویلفیئر ورکر<br/>[8] حکیم<br/>دیگر وضاحت کریں</p>                                                                                                             | <p>[بچے کا نام] کی پیدائش کروانے میں کس نے مدد کی تھی؟</p>                                                                                                                                                                                                                                                                   | <p>407</p> |
| <p>501 پوچھیں ←</p> | <p>[1] ہاں<br/>[2] نہیں</p>                                                                                                                                                                                                                                                                         | <p>[بچے کا نام] کی پیدائش کے بعد، کیا آپ یا آپ کے شوہر نے حمل سے بچاؤ یا اس میں تاخیر کے لیے کوئی طریقہ استعمال کیا تھا؟</p>                                                                                                                                                                                                 | <p>408</p> |
|                     | <p>[1] جھلہ<br/>[2] امپلانٹ<br/>[3] مانع حمل کی گولیاں<br/>[4] کنڈوم<br/>[5] مانع حمل ٹیکہ / انجکشن<br/>[6] وقتی پریہیز<br/>[7] عزل<br/>دیگر وضاحت کریں</p>                                                                                                                                         | <p>کون سا طریقہ آپ یا آپ کے شوہر نے استعمال کیا تھا؟</p>                                                                                                                                                                                                                                                                     | <p>409</p> |

|  |  |  |  |                                                                                                                                                                                                                                         |                                                                             |     |
|--|--|--|--|-----------------------------------------------------------------------------------------------------------------------------------------------------------------------------------------------------------------------------------------|-----------------------------------------------------------------------------|-----|
|  |  |  |  | کتنے دن بعد<br>کتنے مہینے بعد                                                                                                                                                                                                           | آپ نے یہ طریقہ گزشتہ زچگی / بچے کی پیدائش کے کتنے<br>عرصے بعد حاصل کیا تھا؟ | 410 |
|  |  |  |  | [1] سرکاری ہسپتال یا کلینک<br>[2] دیہی مرکز صحت<br>[3] بنیادی مرکز صحت<br>[4] زچہ بچہ سنٹر<br>[5] نجی ہسپتال یا کلینک<br>[6] سورج سنٹر<br>[7] ہو میو پیچہ کلینک<br>[8] دوا کی دکان / فارمیسی<br>[9] شوہر کو معلوم ہے<br>دیگر وضاحت کریں | آپ نے یہ طریقہ کہاں سے حاصل کیا؟                                            | 411 |

### سکیشن پانچ: خاندانی منصوبہ بندی کے بارے میں معلومات

اب میں آپ سے خاندانی منصوبہ بندی کے حوالے سے آپ کی آگاہی اور ماضی میں اس کے استعمال کے بارے میں چند سوالات پوچھنا چاہو گی۔

| فیملی پلاننگ کا طریقہ | کیا آپ نے کبھی [طریقہ کا نام] کے بارے<br>میں سنا ہے؟ | فیملی پلاننگ کے بارے میں علم                                                 |                     |
|-----------------------|------------------------------------------------------|------------------------------------------------------------------------------|---------------------|
| 501                   | مانع حمل گولیاں                                      | اگر آپ ایک گولی کھانا بھول جائیں اور اگلے<br>دن یاد آجائے تو آپ کیا کریں گی؟ | [1] ہاں<br>[2] نہیں |
| 502                   | چھلہ / آئی۔یو۔سی۔ڈی                                  | کیا آپ مجھے بتا سکتی ہیں کہ چھلہ / آئی۔یو۔سی۔ڈی<br>کہاں رکھا جاتا ہے؟        | [1] ہاں<br>[2] نہیں |
| 503                   | انجکشن / ٹیکہ                                        | کیا آپ مجھے بتا سکتی ہیں کہ انجکشن / ٹیکہ کہاں لگایا<br>جاتا ہے؟             | [1] ہاں<br>[2] نہیں |
| 504                   | اسپلائٹ                                              | کیا آپ مجھے بتا سکتی ہیں کہ اسپلائٹ کہاں رکھا جاتا<br>ہے؟                    | [1] ہاں<br>[2] نہیں |
| 505                   | کنڈوم                                                | آپ ایک کنڈوم کتنی مرتبہ استعمال کر سکتی ہیں؟                                 | [1] ہاں<br>[2] نہیں |
| 506                   | عورت کی تل بندی                                      | ایک مرتبہ تل بندی کروانے کے بعد کیا آپ<br>دوبارہ کبھی حاملہ ہو سکتی ہیں؟     | [1] ہاں<br>[2] نہیں |
| 507                   | مردوں کی نس بندی                                     |                                                                              | [1] ہاں<br>[2] نہیں |
| 508                   | وقتی پرہیز کا طریقہ                                  |                                                                              | [1] ہاں<br>[2] نہیں |
| 509                   | عزل اخراج                                            |                                                                              | [1] ہاں<br>[2] نہیں |
| 510                   | ماں کے دودھ کے ذریعے                                 |                                                                              | [1] ہاں<br>[2] نہیں |
| 511                   | ہنگامی مانع حمل کے طریقے                             |                                                                              | [1] ہاں<br>[2] نہیں |
| 512                   | دیگر وضاحت _____                                     |                                                                              | [1] ہاں<br>[2] نہیں |

|                                                                                     |                                                                                                                                                                                                                                                                                                                                                                                                                                                                                                                                         |                                                                                                                                      |     |
|-------------------------------------------------------------------------------------|-----------------------------------------------------------------------------------------------------------------------------------------------------------------------------------------------------------------------------------------------------------------------------------------------------------------------------------------------------------------------------------------------------------------------------------------------------------------------------------------------------------------------------------------|--------------------------------------------------------------------------------------------------------------------------------------|-----|
| 515 پوچھیں                                                                          | [1] ہاں<br>[2] نہیں<br>[3] ابھی فیصلہ نہیں کیا                                                                                                                                                                                                                                                                                                                                                                                                                                                                                          | کیا آپ نے کبھی کوئی چیز استعمال کی یا کوئی طریقہ آزمایا ہے تاکہ حمل میں تاخیر یا اس سے بچا جاسکے؟                                    | 513 |
|                                                                                     | [1] مزید بچوں کی خواہش<br>[2] کم ملاپ / بے قاعدہ ملاپ<br>[3] ماہواری کا بند ہونا / آپریشن سے بچہ دانی نکال دینا<br>[4] بانجھ پن<br>[5] بچے کی پیدائش کے بعد ماہواری بند ہو گئی<br>[6] دودھ پلانا<br>[7] جو اللہ کی رضا<br>[8] فیملی پلاننگ کی مخالفت<br>[9] شوہر کی مخالفت<br>[10] دوسرے لوگوں کی مخالفت<br>[11] مذہبی وجوہات<br>[12] کسی طریقے سے واقف نہیں<br>[13] طریقہ حاصل کرنے کا ذریعہ معلوم نہیں<br>[14] صحت کے خدشات<br>[15] مضر اثرات کا خوف<br>[16] بہت دور ہے<br>[17] بہت مہنگا<br>[18] استعمال میں مشکل<br>دیگر وضاحت کریں | ماضی میں کبھی کوئی بھی طریقے استعمال نہ کرنے کی سب سے اہم وجہ کیا ہے؟                                                                | 514 |
| اب میں آپ سے مستقبل میں مانع حمل کے استعمال کے بارے میں چند سوالات پوچھنا چاہوں گی۔ |                                                                                                                                                                                                                                                                                                                                                                                                                                                                                                                                         |                                                                                                                                      |     |
| 517 پوچھیں                                                                          | [1] ہاں<br>[2] نہیں                                                                                                                                                                                                                                                                                                                                                                                                                                                                                                                     | اس بچے کی پیدائش کے بعد، کیا آپ اگلے حمل میں تاخیر یا بچنے کے لیے خاندانی منصوبہ بندی کا کوئی طریقہ استعمال کرنے کا ارادہ رکھتی ہیں؟ | 515 |
|                                                                                     | [1] کم ملاپ / بے قاعدہ ملاپ<br>[2] دودھ پلانا<br>[3] جو اللہ کی رضا<br>[4] مزید بچوں کی خواہش<br>[5] فیملی پلاننگ کی مخالفت<br>[6] شوہر کی مخالفت<br>[7] دوسرے لوگوں کی مخالفت<br>[8] مذہبی وجوہات                                                                                                                                                                                                                                                                                                                                      | مستقبل میں طریقے استعمال نہ کرنے کی سب سے اہم وجہ کیا ہے؟                                                                            | 516 |



|                                                                           |                                                                                                                                                                                                                                                          |                         |
|---------------------------------------------------------------------------|----------------------------------------------------------------------------------------------------------------------------------------------------------------------------------------------------------------------------------------------------------|-------------------------|
|                                                                           | <p>[9] کسی طریقے سے واقف نہیں</p> <p>[10] طریقہ حاصل کرنے کا ذریعہ معلوم نہیں</p> <p>[11] صحت کے خدشات</p> <p>[12] مضر اثرات کا خوف</p> <p>[13] بہت دور ہے</p> <p>[14] بہت مہنگا</p> <p>[15] استعمال میں مشکل</p> <p>[98] معلوم نہیں / بتا نہیں سکتی</p> |                         |
| اب میں آپ سے مانع حمل کے بارے میں تصورات جاننے کیلئے چند سوالات پوچھوں گی |                                                                                                                                                                                                                                                          |                         |
|                                                                           |                                                                                                                                                                                                                                                          | <b>إرادہ</b>            |
|                                                                           | <p>[1] بالکل نہیں</p> <p>[3] نہ ہاں نہ نہیں</p> <p>[4] کچھ حد تک ہاں</p> <p>[5] مکمل طور پر ہاں</p>                                                                                                                                                      | <p>[2] کچھ خاص نہیں</p> |
| 517                                                                       | کیا آپ بچوں میں وقفے کے لئے فیملی پلاننگ کا طریقہ اپنانے کی سوچ رکھتی ہیں؟                                                                                                                                                                               |                         |
|                                                                           | <p>[1] بالکل نہیں</p> <p>[3] نہ ہاں نہ نہیں</p> <p>[4] کچھ حد تک ہاں</p> <p>[5] مکمل طور پر ہاں</p>                                                                                                                                                      | <p>[2] کچھ خاص نہیں</p> |
| 518                                                                       | کیا آپ بچوں میں وقفے کے لیے ڈاکٹری طریقے اپنانا چاہتی ہیں؟                                                                                                                                                                                               |                         |
|                                                                           | <p>[1] بالکل نہیں</p> <p>[3] نہ ہاں نہ نہیں</p> <p>[4] کچھ حد تک ہاں</p> <p>[5] مکمل طور پر ہاں</p>                                                                                                                                                      | <p>[2] کچھ خاص نہیں</p> |
| 519                                                                       | کیا آپ بچوں میں وقفے کے لیے ڈاکٹری طریقے اپنانے کا ارادہ رکھتی ہیں؟                                                                                                                                                                                      |                         |
|                                                                           | <p>[1] بالکل نہیں</p> <p>[3] نہ ہاں نہ نہیں</p> <p>[4] کچھ حد تک ہاں</p> <p>[5] مکمل طور پر ہاں</p>                                                                                                                                                      | <p>[2] کچھ خاص نہیں</p> |
| <b>مشبت رویہ</b>                                                          |                                                                                                                                                                                                                                                          |                         |
|                                                                           | <p>[1] بالکل نہیں</p> <p>[3] نہ ہاں نہ نہیں</p> <p>[4] کچھ حد تک ہاں</p> <p>[5] مکمل طور پر ہاں</p>                                                                                                                                                      | <p>[2] کچھ خاص نہیں</p> |
| 520                                                                       | کیا آپ بچوں میں وقفے کے لئے ڈاکٹری طریقوں کے استعمال کو کارآمد سمجھتی ہیں؟                                                                                                                                                                               |                         |
|                                                                           | <p>[1] بالکل نہیں</p> <p>[3] نہ ہاں نہ نہیں</p> <p>[4] کچھ حد تک ہاں</p> <p>[5] مکمل طور پر ہاں</p>                                                                                                                                                      | <p>[2] کچھ خاص نہیں</p> |
| 521                                                                       | کیا آپ بچوں میں وقفے کے لئے ڈاکٹری طریقوں کے استعمال کو عقل مندانہ عمل سمجھتی ہیں؟                                                                                                                                                                       |                         |
|                                                                           | <p>[1] بالکل نہیں</p> <p>[3] نہ ہاں نہ نہیں</p> <p>[4] کچھ حد تک ہاں</p> <p>[5] مکمل طور پر ہاں</p>                                                                                                                                                      | <p>[2] کچھ خاص نہیں</p> |
| 522                                                                       | کیا آپ بچوں میں وقفے کے لئے ڈاکٹری طریقوں کے استعمال کو فائدہ مند سمجھتی ہیں؟                                                                                                                                                                            |                         |
|                                                                           | <p>[1] بالکل نہیں</p> <p>[3] نہ ہاں نہ نہیں</p> <p>[4] کچھ حد تک ہاں</p> <p>[5] مکمل طور پر ہاں</p>                                                                                                                                                      | <p>[2] کچھ خاص نہیں</p> |
| 523                                                                       | اگر قدرتی طور پر بچوں میں وقفہ نہ ہو تو ڈاکٹری طریقہ بچوں میں وقفے کے لیے موثر ہے؟                                                                                                                                                                       |                         |
|                                                                           | <p>[1] بالکل نہیں</p> <p>[3] نہ ہاں نہ نہیں</p> <p>[4] کچھ حد تک ہاں</p> <p>[5] مکمل طور پر ہاں</p>                                                                                                                                                      | <p>[2] کچھ خاص نہیں</p> |

| غلط فہمیاں اور خدشات |                                                                                                                                                   |                                                           |                                         |
|----------------------|---------------------------------------------------------------------------------------------------------------------------------------------------|-----------------------------------------------------------|-----------------------------------------|
| 524                  | کیا آپ کے خیال میں بچوں میں وقفے کے لیے ڈاکٹری طریقہ استعمال کرنے سے آپ کی معمولی طبیعت خراب ہو سکتی ہے؟                                          | [5] بالکل نہیں<br>[3] نہ ہاں نہ نہیں<br>[2] کچھ حد تک ہاں | [4] کچھ خاص نہیں<br>[1] مکمل طور پر ہاں |
| 525                  | کیا آپ کے خیال میں بچوں وقفے کے لیے ڈاکٹری طریقے استعمال کرنے سے آپ شدید بیمار ہو جائیں گے؟                                                       | [5] بالکل نہیں<br>[3] نہ ہاں نہ نہیں<br>[2] کچھ حد تک ہاں | [4] کچھ خاص نہیں<br>[1] مکمل طور پر ہاں |
| 526                  | آپ کے خیال میں کیا بچوں میں وقفے کے لیے ڈاکٹری طریقہ استعمال کرنا صحت کے لئے نقصان دے ہے؟                                                         | [5] بالکل نہیں<br>[3] نہ ہاں نہ نہیں<br>[2] کچھ حد تک ہاں | [4] کچھ خاص نہیں<br>[1] مکمل طور پر ہاں |
| 527                  | اگر آپ کو بچوں میں وقفے کا ڈاکٹری طریقہ استعمال کرنے سے کوئی بیماری ہو جائے تو کیا آپ کے خیال میں، آپ کو اس کے علاج پر بہت پیسے خرچ کرنے پڑیں گے؟ | [5] بالکل نہیں<br>[3] نہ ہاں نہ نہیں<br>[2] کچھ حد تک ہاں | [4] کچھ خاص نہیں<br>[1] مکمل طور پر ہاں |
| سماجی اقدار          |                                                                                                                                                   |                                                           |                                         |
| 528                  | کیا آپ کے قریبی لوگ بچوں میں وقفے کے لئے ڈاکٹری طریقے کے استعمال کو اچھا سمجھتے ہیں؟                                                              | [1] بالکل نہیں<br>[3] نہ ہاں نہ نہیں<br>[4] کچھ حد تک ہاں | [2] کچھ خاص نہیں<br>[5] مکمل طور پر ہاں |
| 529                  | کیا آپ کے خیال میں آپ کے علاقے کے لوگ بچوں میں وقفے کے لیے ڈاکٹری طریقوں کی حمایت کرتے ہیں؟                                                       | [1] بالکل نہیں<br>[3] نہ ہاں نہ نہیں<br>[4] کچھ حد تک ہاں | [2] کچھ خاص نہیں<br>[5] مکمل طور پر ہاں |
| 530                  | کیا آپ کے خیال میں آپ کے قریبی لوگ ان عورتوں کو سنانا سمجھتے ہیں جو بچوں میں وقفے کے لیے ڈاکٹری طریقے استعمال کرتی ہیں؟                           | [1] بالکل نہیں<br>[3] نہ ہاں نہ نہیں<br>[4] کچھ حد تک ہاں | [2] کچھ خاص نہیں<br>[5] مکمل طور پر ہاں |
| 531                  | آپ کے قریبی / جان پہچان والے لوگوں کا خیال ہے آپ کو بچوں میں وقفے کے لیے ڈاکٹری طریقہ استعمال کرنا چاہیے؟                                         | [1] بالکل نہیں<br>[3] نہ ہاں نہ نہیں<br>[4] کچھ حد تک ہاں | [2] کچھ خاص نہیں<br>[5] مکمل طور پر ہاں |
| ذاتی اختیار          |                                                                                                                                                   |                                                           |                                         |
| 532                  | کیا بچوں میں وقفے کے لئے ڈاکٹری طریقہ اپنانے کا فیصلہ آپ کے اختیار میں ہے؟                                                                        | [1] بالکل نہیں<br>[3] نہ ہاں نہ نہیں<br>[4] کچھ حد تک ہاں | [2] کچھ خاص نہیں<br>[5] مکمل طور پر ہاں |

|     |                                                                                            |                                                           |                                         |
|-----|--------------------------------------------------------------------------------------------|-----------------------------------------------------------|-----------------------------------------|
| 533 | اگر آپ کوچوں میں وقفے کے لیے ڈاکٹری طریقے استعمال کرنا ہو تو کیا اس میں آپ کو دشواری ہوگی؟ | [1] بالکل نہیں<br>[3] نہ ہاں نہ نہیں<br>[4] کچھ حد تک ہاں | [2] کچھ خاص نہیں<br>[5] مکمل طور پر ہاں |
| 534 | کیا آپ کے لئے، بچوں میں وقفے کے لئے ڈاکٹری طریقہ اپنانا آسان ہے؟                           | [1] بالکل نہیں<br>[3] نہ ہاں نہ نہیں<br>[4] کچھ حد تک ہاں | [2] کچھ خاص نہیں<br>[5] مکمل طور پر ہاں |

### سیکشن چھ: گھرانے میں فیصلہ سازی

601: جو اب دھندہ کیلئے پڑھیے: اب میں آپ سے گھریلو فیصلہ سازی کے حوالے سے کچھ سوالات پوچھوں گی۔ میں ایک ایک کر کے روزمرہ کے مختلف معاملات کے بارے میں پوچھوں گی، آپ نے بتانا ہے کہ عام طور پر ان کی فیصلہ سازی میں کون شامل ہوتا ہے: آپ خود کرتی ہیں، صرف آپ کے شوہر، صرف آپ کی ساس یا سسر، یا کوئی اور فرد۔ اگر ایک سے زیادہ افراد مل کر فیصلہ کرتے ہیں تو آپ ایک سے زیادہ لوگوں کے بارے میں بھی بتا سکتی ہیں۔

ہدایت: [ایک سے زیادہ جوابات ممکن ہیں]۔

| تفصیل                                                                                                   | خود (شرکت کنندہ)         | شوہر                     | ساس                      | سسر                      | کوئی اور فرد             |
|---------------------------------------------------------------------------------------------------------|--------------------------|--------------------------|--------------------------|--------------------------|--------------------------|
| ۱۔ چھوٹا خرچہ جیسے ٹوتھ پیسٹ، صابن، سبزی / دودھ / برتن وغیرہ کی خریداری کا فیصلہ کون کرتا ہے؟           | <input type="checkbox"/> | <input type="checkbox"/> | <input type="checkbox"/> | <input type="checkbox"/> | <input type="checkbox"/> |
| ۲۔ بڑا خرچہ جیسے ٹی وی فرج وغیرہ کی خریداری کا فیصلہ کون کرتا ہے؟                                       | <input type="checkbox"/> | <input type="checkbox"/> | <input type="checkbox"/> | <input type="checkbox"/> | <input type="checkbox"/> |
| ۳۔ عورتوں کی اشیاء مثلاً کپڑے زیورات وغیرہ کی خریداری کا فیصلہ کون کرتا ہے؟                             | <input type="checkbox"/> | <input type="checkbox"/> | <input type="checkbox"/> | <input type="checkbox"/> | <input type="checkbox"/> |
| ۴۔ آپ کی گھر سے باہر ملازمت کا فیصلہ کون کرتا ہے؟                                                       | <input type="checkbox"/> | <input type="checkbox"/> | <input type="checkbox"/> | <input type="checkbox"/> | <input type="checkbox"/> |
| ۵۔ جائیداد / کاشت کاری کے لئے زمین کی خرید و فروخت کا فیصلہ کون کرتا ہے؟                                | <input type="checkbox"/> | <input type="checkbox"/> | <input type="checkbox"/> | <input type="checkbox"/> | <input type="checkbox"/> |
| ۶۔ بچوں کے کپڑے کی خریداری کا فیصلہ کون کرتا ہے؟                                                        | <input type="checkbox"/> | <input type="checkbox"/> | <input type="checkbox"/> | <input type="checkbox"/> | <input type="checkbox"/> |
| ۷۔ اگر بچے بیمار ہوں تو کہاں لے جایا جائے یہ فیصلہ کون کرتا ہے؟                                         | <input type="checkbox"/> | <input type="checkbox"/> | <input type="checkbox"/> | <input type="checkbox"/> | <input type="checkbox"/> |
| ۸۔ اگر آپ بیمار ہوں تو کہاں لے جایا جائے یہ فیصلہ کون کرتا ہے؟                                          | <input type="checkbox"/> | <input type="checkbox"/> | <input type="checkbox"/> | <input type="checkbox"/> | <input type="checkbox"/> |
| ۹۔ دواؤں کی خریداری کا فیصلہ کون کرتا ہے؟                                                               | <input type="checkbox"/> | <input type="checkbox"/> | <input type="checkbox"/> | <input type="checkbox"/> | <input type="checkbox"/> |
| ۱۰۔ بچوں کی تعلیم کے لیے فیصلہ کون کرتا ہے؟                                                             | <input type="checkbox"/> | <input type="checkbox"/> | <input type="checkbox"/> | <input type="checkbox"/> | <input type="checkbox"/> |
| ۱۱۔ رشتے داروں سے ملاقات (کب اور کہاں)، اس کا فیصلہ کون کرتا ہے؟                                        | <input type="checkbox"/> | <input type="checkbox"/> | <input type="checkbox"/> | <input type="checkbox"/> | <input type="checkbox"/> |
| ۱۲۔ آپ کے بچوں کی تعداد کے بارے میں فیصلہ کون کرتا ہے؟                                                  | <input type="checkbox"/> | <input type="checkbox"/> | <input type="checkbox"/> | <input type="checkbox"/> | <input type="checkbox"/> |
| ۱۳۔ وقفے کے لیے خاندانی منصوبہ بندی کے طریقوں کے استعمال کرنے یا نہ کرنے کے حوالے سے فیصلہ کون کرتا ہے؟ | <input type="checkbox"/> | <input type="checkbox"/> | <input type="checkbox"/> | <input type="checkbox"/> | <input type="checkbox"/> |

701 پوچھیں

[1] ہاں  
[2] نہیں

اپنی صحت کی دیکھ بھال حاصل کرنے کے لیے کیا آپ باآسانی اکیلے اپنے گھر سے باہر جاسکتی ہیں؟

602

|     |                                                                                                            |                                                                       |
|-----|------------------------------------------------------------------------------------------------------------|-----------------------------------------------------------------------|
| 603 | اگر نہیں، تو عموماً علاج کے لیے آپ کے ہمراہ کون ہوتا ہے یا آپ عموماً کس کے ساتھ علاج کے لیے باہر جاتی ہیں؟ | [1] اکیلے<br>[2] شوہر کے ہمراہ<br>[3] ساس کے ہمراہ<br>دیگر وضاحت کریں |
|-----|------------------------------------------------------------------------------------------------------------|-----------------------------------------------------------------------|

### سیکشن سات: سماجی و آبادیاتی معلومات

اب میں آپ سے چند سوالات آپ کے رہن سہن کے حوالے سے کرونگی۔ میں سمجھتی ہوں کہ ان کا تعلق براہ راست آپ کی صحت سے نہیں ہے لیکن یہ سوالات ہمیں ان کیونٹی میں رہنے والے لوگوں کے رہن سہن کے بارے میں مدد دیگا۔ برائے مہربانی ایمانداری کے ساتھ سوالوں کے جوابات دیجئے تاکہ ہم اس کیونٹی کی اچھے طریقے سے خدمت کر سکیں۔ سوالات کو ایسے ہی پڑھ کر سنائیں جیسے درج ہیں۔ جوابات نہ پڑھیں۔ شرکت کنندہ کا جواب سن کر متعلقہ جواب پر دائرہ لگائیں۔ تمام سوالات پوچھے جائیں گے۔

|     |                                                                                                                                                                                                                   |                                                                                                                                     |
|-----|-------------------------------------------------------------------------------------------------------------------------------------------------------------------------------------------------------------------|-------------------------------------------------------------------------------------------------------------------------------------|
| 701 | آپ کا گھرانہ کس صوبے میں رہتا ہے؟                                                                                                                                                                                 | [1] بلوچستان<br>[2] خیبر پختون خواہ<br>[3] پنجاب<br>[4] سندھ                                                                        |
| 702 | گھرانے کے کتنے افراد 13 سال یا اس سے کم عمر کے ہیں؟                                                                                                                                                               | [1] پانچ یا پانچ سے زیادہ<br>[2] چار<br>[3] تین<br>[4] دو<br>[5] ایک<br>[6] کوئی نہیں ← 704 پوچھیں                                  |
| 703 | 5 سے 13 سال کی عمر کے کتنے بچے اسکول جاتے ہیں؟                                                                                                                                                                    | [1] کوئی بھی بچہ نہیں جاتا یا کچھ بچے اسکول جاتے ہیں<br>[2] سب بچے جاتے ہیں                                                         |
| 704 | گھرانہ کے کتنے افراد بنیانی پیشے میں منسلک ہیں؟ مثلاً (اعلیٰ افسران، منیجر، کسی پیشہ میں ماہر، تکنیکی یا اعلیٰ پیشہ سے منسلک، کلرک، چیزیں فروخت کرنے والے، خدمات دینے والے، زراعت، ماہی گیری اور دوکاندار نہ ہوں) | [1] دو یا دو سے زیادہ<br>[2] ایک<br>[3] کوئی بھی نہیں                                                                               |
| 705 | گھرانہ کی سربراہ خاتون کی زیادہ سے زیادہ تعلیم کتنی ہے؟                                                                                                                                                           | [1] پہلی جماعت سے کم / معلوم نہیں<br>[2] گھر کی سربراہ خاتون نہیں ہے<br>[3] پہلی جماعت یا پہلی جماعت سے زیادہ                       |
| 706 | گھر میں پینے کے پانی کا بنیادی ذریعہ کیا ہے؟                                                                                                                                                                      | [1] دیگر ذرائع<br>[2] نکا، ڈھاکا، کنواں، موٹر لگی ہوئی ہے، پمپ، ٹیوب ویل، پائپ کے ذریعہ والا پانی                                   |
| 707 | گھرانہ میں کس قسم کا بیت الخلاء / ٹوائلٹ / باتھ روم استعمال کیا جاتا ہے؟                                                                                                                                          | [1] کوئی بھی نہیں یا کوئی سا بھی<br>[2] فلش جس کا تعلق گھر کے نالے سے، گڑھے سے یا گٹر سے<br>[3] فلش جس کا تعلق عوامی بڑے گڑھے سے ہے |
| 708 | کیا گھرانہ میں فریج یا فریزر ہے؟                                                                                                                                                                                  | [1] نہیں<br>[2] ہاں                                                                                                                 |
| 709 | کیا گھرانہ کا ذاتی ٹی وی ہے؟                                                                                                                                                                                      | [1] نہیں<br>[2] ہاں                                                                                                                 |
| 710 | کیا گھرانہ میں ذاتی موٹر سائیکل، سکوٹر، کار یا کوئی دوسری گاڑی ہے؟                                                                                                                                                | [1] نہیں<br>[2] ہاں                                                                                                                 |

## سیکشن آٹھ: گھریلو تشدد

انٹرویو کرنے والے کے لیے ہدایات: معائنہ کریں کہ جس جگہ آپ بیٹھی ہیں یا آپ کے پاس کی جگہیں جہاں آپ کی آواز پہنچ سکتی ہو، وہاں کوئی اور موجود نہ ہو۔ رازداری کو برقرار رکھنے کے لیے اس بات کی یقین دہانی کریں کہ کوئی بھی فرد اتنے قریب نہ ہو کہ وہ آپ کے سوال و جواب کو سن سکے۔ اگر آپ اس عمر کے بچے ہیں جو آپ کی باتوں کو سمجھنے کی صلاحیت رکھتے ہیں، انہیں شائستگی سے جانے کا کہیں۔ صرف چھوٹے بچے جو آپ کی باتوں کو سمجھنے کے قابل ناہوں، وہ بات چیت کے دوران آپ کے ہمراہ رہ سکتے ہیں۔ اُس وقت تک سوالات نہ پوچھیں، جب تک اس بات کی یقین دہانی نہ کر لیں کہ آپ کے پاس کوئی نہیں ہے۔ اس معلومات کی اہمیت کو نظر انداز نہیں کیا جاسکتا، آپ کو رازداری رکھنے کے لیے ہر وہ عمل کرنا ہے جس کے بعد آپ سوال و جواب شروع کر سکیں۔ اگر آپ رازداری کو برقرار رکھنے میں ناکام رہیں گی تو بہت سی اہم معلومات حاصل نہیں کر پائیں گی۔

جو اہد بندہ کے لیے پڑھیے: اب میں آپ سے خواتین کی زندگی کے کچھ اہم پہلوؤں کے بارے میں سوالات کرنا چاہتی ہوں۔ ہو سکتا ہے ان میں سے کچھ سوالات آپ کو بہت ہی ذاتی نوعیت کے لگیں۔ تاہم آپ کے جوابات پاکستان میں موجود خواتین کے حالات کو سمجھنے میں بے انتہا مددگار ثابت ہوں گے۔ میں آپ کو اس بات کی یقین دہانی کرواتی ہوں کہ آپ کے جوابات مکمل طور پر خفیہ رکھے جائیں گے اور ان کا ذکر کسی سے نہیں کیا جائے گا اور آپ کے گھرانے میں کسی کو یہ نہیں معلوم ہو گا کہ آپ سے کس قسم کے سوالات پوچھے گئے ہیں۔

|     |                                                                                                                                       |                                                                                                                                                                            |              |
|-----|---------------------------------------------------------------------------------------------------------------------------------------|----------------------------------------------------------------------------------------------------------------------------------------------------------------------------|--------------|
| 801 | کیا آپ کو کبھی بھی اپنے شوہر یا قریبی عزیز کی طرف سے جسمانی یا جذباتی تشدد کا نشانہ بنایا گیا؟                                        | [1] ہاں<br>[2] نہیں                                                                                                                                                        | ← 805 پوچھیں |
| 802 | گزشتہ 6 ماہ کے دوران، آپ کو کسی نے مارا، تھپڑ مارا، ٹھوکر ماری یا کوئی جسمانی تشدد کیا؟                                               | [1] ہاں<br>[2] نہیں                                                                                                                                                        | ← 805 پوچھیں |
| 803 | اگر ہاں، تو کس نے؟                                                                                                                    | [1] شوہر<br>[2] سسرال<br>[3] کوئی اور                                                                                                                                      |              |
| 804 | کتنی دفعہ تشدد کیا؟                                                                                                                   | تعداد                                                                                                                                                                      |              |
| 805 | جب سے آپ حاملہ ہوئی، آپ کو کسی نے مارا، تھپڑ مارا، ٹھوکر ماری یا کوئی جسمانی تشدد کیا؟                                                | [1] ہاں<br>[2] نہیں                                                                                                                                                        | ← 811 پوچھیں |
| 806 | اگر ہاں، تو کس نے؟                                                                                                                    | [1] شوہر<br>[2] سسرال<br>[3] کوئی اور                                                                                                                                      |              |
| 807 | کتنی دفعہ تشدد کیا؟                                                                                                                   | تعداد                                                                                                                                                                      |              |
| 808 | آپ کے جسم کے کس حصے پر سب سے زیادہ تشدد کیا گیا؟<br>[صرف ایک جواب ممکن ہے، ایک سے زیادہ جواب آنے کی صورت میں سب سے اہم جواب نوٹ کریں] | [1] سر پر<br>[2] چہرے پر<br>[3] چھاتی / سینہ پر<br>[4] پیٹ پر<br>[5] پیٹھ پر / کمر کے اوپری حصے پر<br>[6] پشت پر، کمر کے نچلے / جسم کے پچھلے حصے پر<br>[7] ٹانگ / گھٹنے پر |              |
| 809 | تشدد کس طرح کیا گیا یعنی تشدد کے لئے کس قسم کا اوزار / ہتھیار کا استعمال کیا گیا؟                                                     | [1] ہاتھ / پیر کا استعمال کیا<br>[2] ہتھیار کا استعمال جیسے چھری / لکڑی / برتن / ڈنڈا / پائپ وغیرہ<br>دیگر (وضاحت کریں)                                                    |              |
