# Supplementary material for: A study protocol for an mHealth, multi-centre randomized control trial to promote use of postpartum contraception amongst rural women in Punjab, Pakistan
Source: Springer Nature journal article supplement (doi:10.1186/s12884-019-2427-z), 2019-08-08
Supplement: MOESM4 [file 17050472]

سیکشن ایک: حمل، بچے کی پیدائش اور اس کے بعد کی دیکھ بھال

اب میں آپ سے دیکھ بھال کے بارے میں جاننا چاہوں گی جو آپ نے (نام) کے وقت حمل کے دوران، (نام) کی پیدائش اور اسکے بعد 42 دنوں کے عرصے میں حاصل کی۔

|   |                                                                                                                                    |                                                                                                                                                                                                                                                                                  |            |
|---|------------------------------------------------------------------------------------------------------------------------------------|----------------------------------------------------------------------------------------------------------------------------------------------------------------------------------------------------------------------------------------------------------------------------------|------------|
| 1 | کیا آپ گزشتہ حمل کے دوران حمل کی دیکھ بھال یا معائنے کے لیے کسی کے پاس گئی تھیں؟                                                   | [1] ہاں<br>[2] نہیں                                                                                                                                                                                                                                                              | ← 5 پوچھیں |
| 2 | اُس حمل کے دوران آپ نے کتنی بار اپنا چیک اپ / معائنہ کروایا؟                                                                       | [98] معلوم نہیں                                                                                                                                                                                                                                                                  | تعداد      |
| 3 | آپ نے گزشتہ حمل کے دوران چیک اپ یا معائنہ کہاں سے کروایا؟                                                                          | [1] اپنے گھر میں<br>[2] کسی اور کے گھر میں<br>[3] سرکاری ہسپتال<br>[4] دہلی مرکز صحت<br>[5] بنیادی مرکز صحت<br>[6] ڈسپنری<br>[7] زچہ بچہ سنٹر<br>[8] فلاحی مرکز / فیملی ویلفیئر سنٹر<br>[9] نجی ہسپتال یا کلینک<br>[10] ہومیو پیتھ کا کلینک<br>[11] سورج سنٹر<br>دیگر وضاحت کریں |            |
| 4 | گزشتہ حمل کے دوران چیک اپ / معائنہ کے لیے آپ کس کے پاس گئیں تھیں یعنی آپ کا معائنہ کس نے کیا تھا؟                                  | [1] ڈاکٹر<br>[2] نرس<br>[3] میڈوائف<br>[4] لیڈی ہیلتھ وزیٹر<br>[5] لیڈی ہیلتھ ورکر<br>[6] حکیم / ہومیو پیتھک ڈاکٹر<br>[7] ڈسپینسر / کمپوڈر<br>دیگر وضاحت کریں                                                                                                                    |            |
| 5 | نوٹ: خاتون سے نومولود بچے کا نام پوچھیں جو حال ہی میں پیدا ہوا ہے اور نام لیکر سوال کریں۔<br>[بچے کا نام] کی پیدائش کہاں ہوئی تھی؟ | [1] اپنے گھر میں<br>[2] کسی اور کے گھر میں<br>[3] سرکاری ہسپتال<br>[4] دہلی مرکز صحت<br>[5] بنیادی مرکز صحت<br>[6] زچہ بچہ سنٹر<br>[7] نجی ہسپتال یا کلینک<br>[8] ہومیو پیتھ کا کلینک<br>[9] سورج سنٹر<br>دیگر وضاحت کریں                                                        |            |
| 6 | کیا [بچے کا نام] کی پیدائش بڑے آپریشن کے ذریعے ہوئی تھی جس میں پیٹ کاٹ کر بچے باہر نکال لیتے ہیں؟                                  | [1] ہاں<br>[2] نہیں                                                                                                                                                                                                                                                              |            |
| 7 | [بچے کا نام] کی پیدائش کروانے میں کس نے مدد کی تھی؟                                                                                | [1] خود سے زچگی ہوئی<br>[2] ڈاکٹر<br>[3] نرس<br>[4] میڈوائف<br>[5] لیڈی ہیلتھ وزیٹر<br>[6] غیر تربیت یافتہ دائی<br>[7] فیملی ویلفیئر ورکر<br>[8] حکیم<br>دیگر وضاحت کریں                                                                                                         |            |

|                    |                                                                                                                                                                                                                                                                                                                                                                                                                                   |                                                                                                                                  |           |                |  |                                                                                 |           |
|--------------------|-----------------------------------------------------------------------------------------------------------------------------------------------------------------------------------------------------------------------------------------------------------------------------------------------------------------------------------------------------------------------------------------------------------------------------------|----------------------------------------------------------------------------------------------------------------------------------|-----------|----------------|--|---------------------------------------------------------------------------------|-----------|
| <p>← 12 پوچھیں</p> | <p>[1] ہاں<br/>[2] نہیں</p>                                                                                                                                                                                                                                                                                                                                                                                                       | <p>[بچے کا نام] کی پیدائش کے بعد، کیا آپ یا آپ کے شوہر نے حمل سے بچاؤ یا اس میں تاخیر کے لیے کوئی طریقہ استعمال کیا تھا؟</p>     | <p>8</p>  |                |  |                                                                                 |           |
|                    | <p>[1] چھلہ<br/>[2] امپلائٹ<br/>[3] مانع حمل کی گولیاں<br/>[4] کنڈوم<br/>[5] مانع حمل ٹیکہ / انجکشن<br/>[6] عورت کی ٹل بندی<br/>[7] وقتی پریہیز<br/>[8] عزل<br/>دیگر وضاحت کریں</p>                                                                                                                                                                                                                                               | <p>کون سا طریقہ آپ یا آپ کے شوہر نے استعمال کیا تھا؟</p>                                                                         | <p>9</p>  |                |  |                                                                                 |           |
|                    | <table border="1" style="width: 100%; border-collapse: collapse;"> <tr> <td style="width: 50%; text-align: center;">کتنے دن بعد</td> <td style="width: 50%;"></td> </tr> <tr> <td style="width: 50%; text-align: center;">کتنے مہینے بعد</td> <td style="width: 50%;"></td> </tr> </table>                                                                                                                                        | کتنے دن بعد                                                                                                                      |           | کتنے مہینے بعد |  | <p>آپ نے یہ طریقہ گزشتہ زچگی / بچے کی پیدائش کے کتنے عرصے بعد حاصل کیا تھا؟</p> | <p>10</p> |
| کتنے دن بعد        |                                                                                                                                                                                                                                                                                                                                                                                                                                   |                                                                                                                                  |           |                |  |                                                                                 |           |
| کتنے مہینے بعد     |                                                                                                                                                                                                                                                                                                                                                                                                                                   |                                                                                                                                  |           |                |  |                                                                                 |           |
|                    | <p>[1] سرکاری ہسپتال یا کلینک<br/>[2] دیہی مرکز صحت<br/>[3] بنیادی مرکز صحت<br/>[4] زچہ بچہ سنٹر<br/>[5] نجی ہسپتال یا کلینک<br/>[6] سورج سنٹر<br/>[7] ہومیو پیتھ کا کلینک<br/>[8] دوا کی دکان / فارمیسی<br/>[9] شوہر کو معلوم ہے<br/>دیگر وضاحت کریں</p>                                                                                                                                                                         | <p>آپ نے یہ طریقہ کہاں سے حاصل کیا؟</p>                                                                                          | <p>11</p> |                |  |                                                                                 |           |
|                    | <p>[1] مزید بچوں کی خواہش<br/>[2] کم ملاپ / بے قاعدہ ملاپ<br/>[3] دودھ پلانا<br/>[4] جو اللہ کی رضا<br/>[5] فیملی پلاننگ کی مخالفت<br/>[6] شوہر کی مخالفت<br/>[7] دوسرے لوگوں کی مخالفت<br/>[8] مذہبی وجوہات<br/>[9] کسی طریقے سے واقف نہیں<br/>[10] طریقہ حاصل کرنے کا ذریعہ معلوم نہیں<br/>[11] صحت کے خدشات<br/>[12] مضر اثرات کا خوف<br/>[13] بہت دور ہے<br/>[14] بہت مہنگا<br/>[15] استعمال میں مشکل<br/>دیگر وضاحت کریں</p> | <p>[بچے کا نام] کی پیدائش کے بعد، حمل سے بچاؤ یا اس میں تاخیر کے لیے کوئی بھی طریقہ استعمال نہ کرنے کی سب سے اہم وجہ کیا ہے؟</p> | <p>12</p> |                |  |                                                                                 |           |

سکشن دو: صحت کے حوالے سے آگاہی

اب میں آپ سے چند سوالوں کے ذریعے یہ جاننا چاہوں گی کہ حمل، بچے کی پیدائش اور پیدا ہونے والے بچے کی صحت کے حوالے سے کن باتوں کا خیال رکھنا چاہیے۔

|  |                                                                                                                                                                                                                                                                                                                                                                                                                                                                                                                                                                                                        |                                                                                                                                                                                  |    |
|--|--------------------------------------------------------------------------------------------------------------------------------------------------------------------------------------------------------------------------------------------------------------------------------------------------------------------------------------------------------------------------------------------------------------------------------------------------------------------------------------------------------------------------------------------------------------------------------------------------------|----------------------------------------------------------------------------------------------------------------------------------------------------------------------------------|----|
|  | <p>[1] زچگی کے لئے، صحت کے مرکز کے بارے میں پہلے سے معلومات</p> <p>[2] زچگی کے لئے، تربیت یافتہ صحت کے فرد کے بارے میں پہلے سے معلومات</p> <p>[3] حاملہ عورت کو صحت کے مرکز پر لے جانے کے لئے گاڑی کا پہلے سے انتظام</p> <p>[4] گاڑی کے انتظام اور زچگی کے لئے ہونے والے اخراجات کے لئے رقم کا انتظام</p> <p>[5] زچگی یا اس سلسلے میں ہونے والے درد کے دوران ممکنہ طور پر پیدا ہونے والی ہنگامی صورت کے لیے خون کا پہلے سے انتظام</p> <p>[6] حمل کے دوران تربیت یافتہ صحت کے فرد سے معائنہ کروانا</p> <p>[98] معلوم نہیں</p> <p>دیگر وضاحت کریں:</p> <p>الف: _____</p> <p>ب: _____</p> <p>ج: _____</p> | <p>کیا آپ ہمیں بتائیں گی، بچے کی پیدائش کے لیے کیا ضروری انتظامات پہلے سے کرنے چاہیے؟</p> <p>کریڈیں: اور کچھ؟ [ایک سے زیادہ جوابات ممکن ہیں]</p>                                 | 13 |
|  | <p>[1] سانس لینے میں مشکل پیش آنا</p> <p>[2] شرم گاہ سے خون آنا</p> <p>[3] بل پڑنا، جھٹکے لگنا یا دورے پڑنا یا بے ہوش ہو جانا / سر میں شدید درد ہونا / ڈھنڈلا نظر آنا</p> <p>[4] پیٹ میں شدید درد ہونا</p> <p>[5] شرم گاہ سے غیر معمولی بدبو دار پانی کا آنا</p> <p>[6] پیٹ میں بچے کی حرکت میں کمی آنا یا حرکت کا بالکل نہ ہونا</p> <p>[98] معلوم نہیں</p> <p>دیگر وضاحت کریں:</p> <p>الف: _____</p> <p>ب: _____</p> <p>ج: _____</p>                                                                                                                                                                  | <p>حمل کے دوران خطرے کی کون سی علامات ہو سکتی ہیں جن کے سلسلے میں صحت کے فرد (مثلاً ڈاکٹر) کی فوری ضرورت پیش آسکتی ہے؟</p> <p>کریڈیں: اور کچھ [ایک سے زیادہ جوابات ممکن ہیں]</p> | 14 |
|  | <p>تعداد</p> <p>[98] معلوم نہیں</p>                                                                                                                                                                                                                                                                                                                                                                                                                                                                                                                                                                    | <p>آپ کے خیال میں دوران حمل کم از کم کتنی بار معائنہ کروانا چاہیے؟</p>                                                                                                           | 15 |

|  |                                                                                                                                                                                                                                                                                                                                                                                                                                                                                           |                                                                                                                                                                                                                 |           |
|--|-------------------------------------------------------------------------------------------------------------------------------------------------------------------------------------------------------------------------------------------------------------------------------------------------------------------------------------------------------------------------------------------------------------------------------------------------------------------------------------------|-----------------------------------------------------------------------------------------------------------------------------------------------------------------------------------------------------------------|-----------|
|  | <p>[1] پہلی سہ ماہی (1 سے 3 ماہ کا حمل)</p> <p>[2] دوسری سہ ماہی (4 سے 6 ماہ کا حمل)</p> <p>[3] تیسری سہ ماہی (7 سے حمل کا آخری مہینہ)</p> <p>[98] معلوم نہیں</p>                                                                                                                                                                                                                                                                                                                         | <p>16 دوران حمل کا پہلا معائنہ کب کروانا چاہیے؟</p>                                                                                                                                                             | <p>16</p> |
|  | <p>تعداد</p> <p>[98] معلوم نہیں</p>                                                                                                                                                                                                                                                                                                                                                                                                                                                       | <p>17 دوران حمل تشخیص سے بچاؤ کے لیے کتنے ٹیکے لگوانے چاہیے؟</p>                                                                                                                                                | <p>17</p> |
|  | <p>[1] شرم گاہ سے خون آنا</p> <p>[2] سانس لینے میں مشکل پیش آنا</p> <p>[3] بخار ہونا</p> <p>[4] پیٹ درد ہونا</p> <p>[5] سر میں شدید درد ہونا / دھندلا نظر آنا</p> <p>[6] بل پڑنا، جھٹکے لگنا یا دورے پڑنا یا بے ہوش ہو جانا</p> <p>[7] شرم گاہ سے غیر معمولی بدبو دار پانی کا آنا</p> <p>[8] ایسی کیفیت یا خیالات آنا جن سے یہ ظاہر ہو کہ ماں خود کو یا اپنے بچے کو نقصان پہنچائے گی</p> <p>[98] معلوم نہیں</p> <p>دیگر وضاحت کریں:</p> <p>الف: _____</p> <p>ب: _____</p> <p>ج: _____</p> | <p>18 بچے کی پیدائش کے بعد چھ ہفتوں کے عرصے میں، ماں کے لیے خطرے کی کون سی علامات ہو سکتی ہیں جن کے سلسلے میں ڈاکٹر وغیرہ کی فوری ضرورت پیش آسکتی ہے؟</p> <p>کریڈیٹ: اور کچھ [ایک سے زیادہ جوابات ممکن ہیں]</p> | <p>18</p> |
|  | <p>تعداد</p> <p>[98] معلوم نہیں</p>                                                                                                                                                                                                                                                                                                                                                                                                                                                       | <p>19 آپ کے خیال میں بچے کی پیدائش کے بعد کتنی مرتبہ ماں اور بچے کا معائنہ کروانا چاہیے؟</p>                                                                                                                    | <p>19</p> |

|  |                                                                                                                                                                                                                                                                                                                                                                                                                                                                                                                                                                                                                                                                                                                                                                                   |                                                                                                                                                                                                        |    |                                                              |    |  |  |                                                            |    |
|--|-----------------------------------------------------------------------------------------------------------------------------------------------------------------------------------------------------------------------------------------------------------------------------------------------------------------------------------------------------------------------------------------------------------------------------------------------------------------------------------------------------------------------------------------------------------------------------------------------------------------------------------------------------------------------------------------------------------------------------------------------------------------------------------|--------------------------------------------------------------------------------------------------------------------------------------------------------------------------------------------------------|----|--------------------------------------------------------------|----|--|--|------------------------------------------------------------|----|
|  | <p>[1] سانس لینے میں مشکل پیش آنا</p> <p>[2] بل پڑنا، جھٹکے لگنا یا دور سے پڑنا یا بے ہوش ہو جانا</p> <p>[3] جلد اور منہ کی جھلیوں کا رنگ نیلا ہو جانا</p> <p>[4] رنگت کا زرد (پیلا) ہو جانا</p> <p>[5] سُستی / کاہلی</p> <p>[6] جلد اور منہ کی جھلیوں کا رنگ نیلا ہو جانا</p> <p>[7] چھوٹے پر جسم گرم محسوس ہونا (بخار)</p> <p>[8] خون کا اخراج ہونا</p> <p>[9] شدید ریتان (پیلیا) / جلد اور آنکھوں کا رنگ پیلا ہو جانا ہے</p> <p>[10] بچہ دودھ نہیں پیتا یا بہت کم پیتا ہے</p> <p>[11] دست ہونا</p> <p>[12] مستقل طور پر اٹلیاں ہونا یا بیٹ کا پھول جانا</p> <p>[13] ناف میں پس پڑ جانا یا، آنکھوں یا جلد کا سرخ ہو جانا</p> <p>[14] ہاتھوں، ٹانگوں یا جوڑوں میں سوجن ہونا</p> <p>[98] معلوم نہیں</p> <p>دیگر وضاحت کریں:</p> <p>الف: _____</p> <p>ب: _____</p> <p>ج: _____</p> | <p>پیدائش کے بعد چھ ہفتوں کے عرصے میں، بچے کے لیے خطرے کی کون سی علامات ہو سکتی ہیں جن کے سلسلے میں، ڈاکٹر وغیرہ کی فوری ضرورت پیش آسکتی ہے؟</p> <p>کریڈیں: اور کچھ [ایک سے زیادہ جوابات ممکن ہیں]</p> | 20 |                                                              |    |  |  |                                                            |    |
|  | <p>[1] بچے کو گرم کپڑے میں لپیٹنا چاہیے</p> <p>[2] بچے کو ماں کی برہنہ چھاتی کے ساتھ لگانا چاہیے</p> <p>[98] معلوم نہیں</p> <p>دیگر وضاحت کریں: _____</p>                                                                                                                                                                                                                                                                                                                                                                                                                                                                                                                                                                                                                         | <p>پیدائش کے فوراً بعد بچے کو گرم رکھنے کے لیے کیا کرنا چاہیے؟</p>                                                                                                                                     | 21 |                                                              |    |  |  |                                                            |    |
|  | <table border="1" data-bbox="414 1438 568 1606"> <tr><td></td><td></td></tr> <tr><td></td><td></td></tr> <tr><td></td><td></td></tr> </table> <p>منٹ</p> <p>گھنٹے</p> <p>دن</p> <p>[0] فوراً</p> <p>[98] معلوم نہیں</p>                                                                                                                                                                                                                                                                                                                                                                                                                                                                                                                                                           |                                                                                                                                                                                                        |    |                                                              |    |  |  | <p>پیدائش کے بعد بچے کو ماں کا دودھ کب سے پلانا چاہیے؟</p> | 22 |
|  |                                                                                                                                                                                                                                                                                                                                                                                                                                                                                                                                                                                                                                                                                                                                                                                   |                                                                                                                                                                                                        |    |                                                              |    |  |  |                                                            |    |
|  |                                                                                                                                                                                                                                                                                                                                                                                                                                                                                                                                                                                                                                                                                                                                                                                   |                                                                                                                                                                                                        |    |                                                              |    |  |  |                                                            |    |
|  |                                                                                                                                                                                                                                                                                                                                                                                                                                                                                                                                                                                                                                                                                                                                                                                   |                                                                                                                                                                                                        |    |                                                              |    |  |  |                                                            |    |
|  | <table border="1" data-bbox="414 1722 568 1785"> <tr><td></td><td></td></tr> </table> <p>عمر مہینوں میں</p> <p>[98] معلوم نہیں</p>                                                                                                                                                                                                                                                                                                                                                                                                                                                                                                                                                                                                                                                |                                                                                                                                                                                                        |    | <p>کس عمر تک بچے کو صرف اور صرف ماں کا دودھ پلانا چاہیے؟</p> | 23 |  |  |                                                            |    |
|  |                                                                                                                                                                                                                                                                                                                                                                                                                                                                                                                                                                                                                                                                                                                                                                                   |                                                                                                                                                                                                        |    |                                                              |    |  |  |                                                            |    |

|  |  |  |  |                                           |                                                                                                 |    |
|--|--|--|--|-------------------------------------------|-------------------------------------------------------------------------------------------------|----|
|  |  |  |  | منٹ<br>گھنٹے<br>دن                        | یہ بتائیے، سچے کی پیدائش کے بعد احتیاطی طور پر بیماریوں سے بچاؤ کے لیے پہلا ٹیکاکب لگانا چاہیے؟ | 24 |
|  |  |  |  | [0] پیدائش کے فوری بعد<br>[98] معلوم نہیں |                                                                                                 |    |

### سیکشن تین: خاندانی منصوبہ بندی

اب میں آپ سے خاندانی منصوبہ بندی کے حوالے سے آپ کی آگاہی اور ماضی میں اس کے استعمال کے بارے میں چند سوالات پوچھنا چاہوں گی۔

|    | خاندانی منصوبہ بندی کا طریقہ                                                                      | کیا آپ نے کبھی [طریقہ کا نام] کے بارے میں سنا ہے؟ | کیا آپ کو کسی جگہ کا علم ہے جہاں سے خاندانی منصوبہ بندی کا طریقہ حاصل کیا جاسکتا ہے؟ |             |
|----|---------------------------------------------------------------------------------------------------|---------------------------------------------------|--------------------------------------------------------------------------------------|-------------|
| 25 | مانع حمل گولیاں                                                                                   | [1] ہاں [2] نہیں                                  | [1] ہاں [2] نہیں                                                                     |             |
| 26 | چھلہ / آئی۔یو۔سی۔ڈی                                                                               | [1] ہاں [2] نہیں                                  | [1] ہاں [2] نہیں                                                                     |             |
| 27 | انجکشن / ٹیکہ                                                                                     | [1] ہاں [2] نہیں                                  | [1] ہاں [2] نہیں                                                                     |             |
| 28 | امپلائنٹ                                                                                          | [1] ہاں [2] نہیں                                  | [1] ہاں [2] نہیں                                                                     |             |
| 29 | کنڈوم                                                                                             | [1] ہاں [2] نہیں                                  | [1] ہاں [2] نہیں                                                                     |             |
| 30 | عورت کی تل بندی                                                                                   | [1] ہاں [2] نہیں                                  | [1] ہاں [2] نہیں                                                                     |             |
| 31 | مردوں کی نس بندی                                                                                  | [1] ہاں [2] نہیں                                  | [1] ہاں [2] نہیں                                                                     |             |
| 32 | وقتی پرہیز کا طریقہ                                                                               | [1] ہاں [2] نہیں                                  | [1] ہاں [2] نہیں                                                                     |             |
| 33 | عزل اخراج                                                                                         | [1] ہاں [2] نہیں                                  | [1] ہاں [2] نہیں                                                                     |             |
| 34 | ماں کے دودھ کے ذریعے                                                                              | [1] ہاں [2] نہیں                                  | [1] ہاں [2] نہیں                                                                     |             |
| 35 | ہنگامی مانع حمل کے طریقے                                                                          | [1] ہاں [2] نہیں                                  | [1] ہاں [2] نہیں                                                                     |             |
| 36 | دیگر وضاحت                                                                                        | [1] ہاں [2] نہیں                                  | [1] ہاں [2] نہیں                                                                     |             |
| 37 | کیا آپ نے کبھی کوئی چیز استعمال کی یا کوئی طریقہ آزمایا ہے تاکہ حمل میں تاخیر یا اس سے بچا جاسکے؟ | [1] ہاں [2] نہیں                                  | [3] ابھی فیصلہ نہیں کیا                                                              | ← 39 پوچھیں |

|                                                                                            |                                                                                                                                                                                                                                                                                                                                                                                                                                                                                                                                                                                                                        |                                                                                                                                          |    |
|--------------------------------------------------------------------------------------------|------------------------------------------------------------------------------------------------------------------------------------------------------------------------------------------------------------------------------------------------------------------------------------------------------------------------------------------------------------------------------------------------------------------------------------------------------------------------------------------------------------------------------------------------------------------------------------------------------------------------|------------------------------------------------------------------------------------------------------------------------------------------|----|
|                                                                                            | <p>[1] مزید بچوں کی خواہش</p> <p>[2] کم ملاپ / بے قاعدہ ملاپ</p> <p>[3] ماہواری کا بند ہونا / آپریشن سے بچہ دانی نکال دینا</p> <p>[4] بانجھ پن</p> <p>[5] بچے کی پیدائش کے بعد ماہواری بند ہو گئی</p> <p>[6] دودھ پلانا</p> <p>[7] جو اللہ کی رضا</p> <p>[8] فیملی پلاننگ کی مخالفت</p> <p>[9] شوہر کی مخالفت</p> <p>[10] دوسرے لوگوں کی مخالفت</p> <p>[11] مذہبی وجوہات</p> <p>[12] کسی طریقے سے واقف نہیں</p> <p>[13] طریقہ حاصل کرنے کا ذریعہ معلوم نہیں</p> <p>[14] صحت کے خدشات</p> <p>[15] مضر اثرات کا خوف</p> <p>[16] بہت دور ہے</p> <p>[17] بہت مہنگا</p> <p>[18] استعمال میں مشکل</p> <p>دیگر وضاحت کریں</p> | <p>ماضی میں کبھی کوئی بھی طریقے استعمال نہ کرنے کی سب سے اہم وجہ کیا ہے؟</p>                                                             | 38 |
| <p>اب میں آپ سے مستقبل میں مانع حمل کے استعمال کے بارے میں چند سوالات پوچھنا چاہوں گی۔</p> |                                                                                                                                                                                                                                                                                                                                                                                                                                                                                                                                                                                                                        |                                                                                                                                          |    |
| <p>← 41 پوچھیں</p>                                                                         | <p>[1] ہاں</p> <p>[2] نہیں</p>                                                                                                                                                                                                                                                                                                                                                                                                                                                                                                                                                                                         | <p>بچے کی پیدائش کے بعد، کیا آپ اگلے حمل میں تاخیر یا بچنے کے لیے خاندانی منصوبہ بندی کا کوئی طریقہ استعمال کرنے کا ارادہ رکھتی ہیں؟</p> | 39 |

|                                                                            |                                                                                                                                                                                                                                                                                                                                                                                                                                                                                               |                                                                          |                                                                                   |    |
|----------------------------------------------------------------------------|-----------------------------------------------------------------------------------------------------------------------------------------------------------------------------------------------------------------------------------------------------------------------------------------------------------------------------------------------------------------------------------------------------------------------------------------------------------------------------------------------|--------------------------------------------------------------------------|-----------------------------------------------------------------------------------|----|
|                                                                            | <p>[1] کم ملاپ / بے قاعدہ ملاپ</p> <p>[2] دودھ پلانا</p> <p>[3] جو اللہ کی رضا</p> <p>[4] مزید بچوں کی خواہش</p> <p>[5] فیملی پلاننگ کی مخالف</p> <p>[6] شوہر کی مخالفت</p> <p>[7] دوسرے لوگوں کی مخالفت</p> <p>[8] مذہبی وجوہات</p> <p>[9] کسی طریقے سے واقف نہیں</p> <p>[10] طریقہ حاصل کرنے کا ذریعے معلوم نہیں</p> <p>[11] صحت کے خدشات</p> <p>[12] مضر اثرات کا خوف</p> <p>[13] بہت دور ہے</p> <p>[14] بہت مہنگا</p> <p>[15] استعمال میں مشکل</p> <p>[98] معلوم نہیں / بتا نہیں سکتی</p> | <p>مستقبل میں طریقے استعمال نہ کرنے کی سب سے اہم وجہ کیا ہے؟</p>         | 40                                                                                |    |
| اب میں آپ سے مانع حمل کے بارے میں تصورات جاننے کیلئے چند سوالات پوچھوں گیں |                                                                                                                                                                                                                                                                                                                                                                                                                                                                                               |                                                                          |                                                                                   |    |
|                                                                            |                                                                                                                                                                                                                                                                                                                                                                                                                                                                                               | <b>ارادہ</b>                                                             |                                                                                   |    |
|                                                                            | <p>[2] کچھ خاص نہیں</p> <p>[5] عمل طور پر ہاں</p>                                                                                                                                                                                                                                                                                                                                                                                                                                             | <p>[1] بالکل نہیں</p> <p>[3] نہ ہاں نہ نہیں</p> <p>[4] کچھ حد تک ہاں</p> | <p>کیا آپ بچوں میں وقفے کے لئے فیملی پلاننگ کا طریقہ اپنانے کی سوچ رکھتی ہیں؟</p> | 41 |
|                                                                            | <p>[2] کچھ خاص نہیں</p> <p>[5] عمل طور پر ہاں</p>                                                                                                                                                                                                                                                                                                                                                                                                                                             | <p>[1] بالکل نہیں</p> <p>[3] نہ ہاں نہ نہیں</p> <p>[4] کچھ حد تک ہاں</p> | <p>کیا آپ بچوں میں وقفے کے لئے ڈاکٹری طریقے اپنانا چاہتی ہیں؟</p>                 | 42 |
|                                                                            | <p>[2] کچھ خاص نہیں</p> <p>[5] عمل طور پر ہاں</p>                                                                                                                                                                                                                                                                                                                                                                                                                                             | <p>[1] بالکل نہیں</p> <p>[3] نہ ہاں نہ نہیں</p> <p>[4] کچھ حد تک ہاں</p> | <p>کیا آپ بچوں میں وقفے کے لئے ڈاکٹری طریقے اپنانے کا ارادہ رکھتی ہیں؟</p>        | 43 |
|                                                                            |                                                                                                                                                                                                                                                                                                                                                                                                                                                                                               | <b>مثریت رویہ</b>                                                        |                                                                                   |    |
|                                                                            | <p>[2] کچھ خاص نہیں</p> <p>[5] عمل طور پر ہاں</p>                                                                                                                                                                                                                                                                                                                                                                                                                                             | <p>[1] بالکل نہیں</p> <p>[3] نہ ہاں نہ نہیں</p> <p>[4] کچھ حد تک ہاں</p> | <p>کیا آپ بچوں میں وقفے کے لئے ڈاکٹری طریقوں کے استعمال کو کارآمد سمجھتی ہیں؟</p> | 44 |



|                             |                                                                                                                                                   |                                                                                  |                                         |
|-----------------------------|---------------------------------------------------------------------------------------------------------------------------------------------------|----------------------------------------------------------------------------------|-----------------------------------------|
| 45                          | کیا آپ بچوں میں وقفے کے لئے ڈاکٹری طریقوں کے استعمال کو عقل مندانہ عمل سمجھتی ہیں؟                                                                | [1] بالکل نہیں<br>[3] نہ ہاں نہ نہیں<br>[4] کچھ حد تک ہاں<br>[5] مکمل طور پر ہاں | [2] کچھ خاص نہیں<br>[5] مکمل طور پر ہاں |
| 46                          | کیا آپ بچوں میں وقفے کے لئے ڈاکٹری طریقوں کے استعمال کو فائدہ مند سمجھتی ہیں؟                                                                     | [1] بالکل نہیں<br>[3] نہ ہاں نہ نہیں<br>[4] کچھ حد تک ہاں<br>[5] مکمل طور پر ہاں | [2] کچھ خاص نہیں<br>[5] مکمل طور پر ہاں |
| 47                          | اگر قدرتی طور پر بچوں میں وقفہ نہ ہو تو ڈاکٹری طریقہ بچوں میں وقفے کے لیے موثر ہے؟                                                                | [1] بالکل نہیں<br>[3] نہ ہاں نہ نہیں<br>[4] کچھ حد تک ہاں<br>[5] مکمل طور پر ہاں | [2] کچھ خاص نہیں<br>[5] مکمل طور پر ہاں |
| <b>غلط فہمیاں اور خدشات</b> |                                                                                                                                                   |                                                                                  |                                         |
| 48                          | کیا آپ کے خیال میں بچوں میں وقفے کے لیے ڈاکٹری طریقہ استعمال کرنے سے آپ کی معمولی طبیعت خراب ہو سکتی ہے؟                                          | [5] بالکل نہیں<br>[3] نہ ہاں نہ نہیں<br>[2] کچھ حد تک ہاں<br>[1] مکمل طور پر ہاں | [4] کچھ خاص نہیں<br>[1] مکمل طور پر ہاں |
| 49                          | کیا آپ کے خیال میں بچوں میں وقفے کے لیے ڈاکٹری طریقہ استعمال کرنے سے آپ شدید بیمار ہو جائیں گے؟                                                   | [5] بالکل نہیں<br>[3] نہ ہاں نہ نہیں<br>[2] کچھ حد تک ہاں<br>[1] مکمل طور پر ہاں | [4] کچھ خاص نہیں<br>[1] مکمل طور پر ہاں |
| 50                          | آپ کے خیال میں کیا بچوں میں وقفے کے لیے ڈاکٹری طریقہ استعمال کرنا صحت کے لئے نقصان دے ہے؟                                                         | [5] بالکل نہیں<br>[3] نہ ہاں نہ نہیں<br>[2] کچھ حد تک ہاں<br>[1] مکمل طور پر ہاں | [4] کچھ خاص نہیں<br>[1] مکمل طور پر ہاں |
| 51                          | اگر آپ کو بچوں میں وقفے کا ڈاکٹری طریقہ استعمال کرنے سے کوئی بیماری ہو جائے تو کیا آپ کے خیال میں، آپ کو اس کے علاج پر بہت پیسے خرچ کرنے پڑیں گے؟ | [5] بالکل نہیں<br>[3] نہ ہاں نہ نہیں<br>[2] کچھ حد تک ہاں<br>[1] مکمل طور پر ہاں | [4] کچھ خاص نہیں<br>[1] مکمل طور پر ہاں |
| <b>سمجھی اقدار</b>          |                                                                                                                                                   |                                                                                  |                                         |
| 52                          | کیا آپ کے قریبی لوگ بچوں میں وقفے کے لئے ڈاکٹری طریقے کے استعمال کو اچھا سمجھتے ہیں؟                                                              | [1] بالکل نہیں<br>[3] نہ ہاں نہ نہیں<br>[4] کچھ حد تک ہاں<br>[5] مکمل طور پر ہاں | [2] کچھ خاص نہیں<br>[5] مکمل طور پر ہاں |
| 53                          | کیا آپ کے خیال میں آپ کے علاقے کے لوگ بچوں میں وقفے کے لیے ڈاکٹری طریقوں کی حمایت کرتے ہیں؟                                                       | [1] بالکل نہیں<br>[3] نہ ہاں نہ نہیں<br>[4] کچھ حد تک ہاں<br>[5] مکمل طور پر ہاں | [2] کچھ خاص نہیں<br>[5] مکمل طور پر ہاں |

|                                                                                              |  |                                                                                  |                                   |    |                                                                                                                         |
|----------------------------------------------------------------------------------------------|--|----------------------------------------------------------------------------------|-----------------------------------|----|-------------------------------------------------------------------------------------------------------------------------|
|                                                                                              |  | [1] بالکل نہیں<br>[3] نہ ہاں نہ نہیں<br>[4] کچھ حد تک ہاں<br>[5] مکمل طور پر ہاں | [2] کچھ خاص نہیں                  | 54 | کیا آپ کے خیال میں آپ کے قریبی لوگ ان عورتوں کو سیانا سمجھتے ہیں جو بچوں میں وقفے کے لیے ڈاکٹری طریقے استعمال کرتی ہیں؟ |
|                                                                                              |  | [1] بالکل نہیں<br>[3] نہ ہاں نہ نہیں<br>[4] کچھ حد تک ہاں<br>[5] مکمل طور پر ہاں | [2] کچھ خاص نہیں                  | 55 | آپ کے قریبی / جان پہچان والے لوگوں کا خیال ہے آپ کو بچوں میں وقفے کے لیے ڈاکٹری طریقے استعمال کرنا چاہیے؟               |
|                                                                                              |  |                                                                                  |                                   |    | <b>ذاتی قابو</b>                                                                                                        |
|                                                                                              |  | [1] بالکل نہیں<br>[3] نہ ہاں نہ نہیں<br>[4] کچھ حد تک ہاں<br>[5] مکمل طور پر ہاں | [2] کچھ خاص نہیں                  | 56 | کیا بچوں میں وقفے کے لئے ڈاکٹری طریقے اپنانے کا فیصلہ آپ کے اختیار میں ہے؟                                              |
|                                                                                              |  | [1] بالکل نہیں<br>[3] نہ ہاں نہ نہیں<br>[4] کچھ حد تک ہاں<br>[5] مکمل طور پر ہاں | [2] کچھ خاص نہیں                  | 57 | اگر آپ کو بچوں میں وقفے کے لیے ڈاکٹری طریقے استعمال کرنا ہو تو کیا اس میں آپ کو دشواری ہوگی؟                            |
|                                                                                              |  | [1] بالکل نہیں<br>[3] نہ ہاں نہ نہیں<br>[4] کچھ حد تک ہاں<br>[5] مکمل طور پر ہاں | [2] کچھ خاص نہیں                  | 58 | کیا آپ کے لئے، بچوں میں وقفے کے لئے ڈاکٹری طریقے اپنانا آسان ہے؟                                                        |
| <b>سیکشن چار: مشورات کی تشخیص، صوتی پیغام اور تحریری پیغام</b>                               |  |                                                                                  |                                   |    |                                                                                                                         |
| اب میں آپ سے اُن صوتی پیغامات کے بارے میں پوچھوں گی جو آپ نے اپنے حمل کے دوران موصول کیے تھے |  |                                                                                  |                                   |    |                                                                                                                         |
|                                                                                              |  | [1] ہاں<br>[2] نہیں                                                              |                                   | 59 | کیا آپ نے گزشتہ حمل کے دوران یا آخری زچگی کے بعد 42 دن کے اندر MSS سے کوئی صوتی پیغامات موصول کیے ہیں؟                  |
|                                                                                              |  |                                                                                  | پیغامات کی تعداد<br>[98] یاد نہیں | 60 | آپ نے کتنے پیغامات موصول کیے؟                                                                                           |
|                                                                                              |  | [1] اُردو<br>[2] انگریزی<br>[3] پنجابی<br>[4] سرائیکی<br>[5] سندھی               | [3] پنجابی                        | 61 | پیغامات کس زبان میں تھے؟                                                                                                |
|                                                                                              |  | [1] ہاں<br>[2] نہیں                                                              |                                   | 62 | کیا پیغامات کو سمجھنا آسان تھا؟                                                                                         |
|                                                                                              |  |                                                                                  | سیکنڈ<br>منٹ                      | 63 | پیغامات کا اوسط دورانیہ کتنا تھا؟                                                                                       |
|                                                                                              |  | [1] ہاں<br>[2] نہیں                                                              |                                   | 64 | کیا MSS نے آپ کو اُن اوقات پر پیغامات بھیجے تھے جن میں آپ کے لیے اُن کو سننا آسان تھا؟                                  |
|                                                                                              |  |                                                                                  |                                   |    | ← 70 پوچھیں                                                                                                             |
|                                                                                              |  |                                                                                  |                                   |    | ← 66 پوچھیں                                                                                                             |

|  |                                                                                                                                                                                                                                                                                                                                                                                                                                                                                                                                                                                                                                                                                                                                                                                                                                                                                                                                                                                      |                                                                                                                                                                                                              |    |
|--|--------------------------------------------------------------------------------------------------------------------------------------------------------------------------------------------------------------------------------------------------------------------------------------------------------------------------------------------------------------------------------------------------------------------------------------------------------------------------------------------------------------------------------------------------------------------------------------------------------------------------------------------------------------------------------------------------------------------------------------------------------------------------------------------------------------------------------------------------------------------------------------------------------------------------------------------------------------------------------------|--------------------------------------------------------------------------------------------------------------------------------------------------------------------------------------------------------------|----|
|  | وقت ___:___                                                                                                                                                                                                                                                                                                                                                                                                                                                                                                                                                                                                                                                                                                                                                                                                                                                                                                                                                                          | 65 اگر نہیں تو پھر کس وقت آپ کو پیغامات بھیجنے چاہیے تھے؟                                                                                                                                                    | 65 |
|  |                                                                                                                                                                                                                                                                                                                                                                                                                                                                                                                                                                                                                                                                                                                                                                                                                                                                                                                                                                                      | 66 کیا MSS کے مندرجہ ذیل اعمال سے آپ آرام دہ تھیں؟<br>ہاں      نہیں<br>پیغامات کے اوقات      ۱      ۲<br>پیغامات کا دورانیہ      ۱      ۲<br>پیغامات کی زبان      ۱      ۲<br>پیغامات کی تعداد      ۱      ۲ | 66 |
|  | ۱- حمل کے دوران ڈاکٹری دوروں کی کم از کم تعداد<br>۲- حمل کے دوران ڈاکٹری دوروں کا وقت<br>۳- تشنج کے ٹیکوں کی تعداد حمل کے دوران<br>۴- حمل کے دوران غزائیت سپلنٹ کے بارے میں معلومات<br>۵- برے حمل کے علامات<br>۶- برے حمل کی صورت میں کیا کرنا چاہیے<br>۷- حمل کے دوران ایمر جنسی کی صورت میں کیا کرنا چاہیے؟<br>۸- کیسے اور کب پیدا ایٹش کے لیے تیاری کرنی چاہیے<br>۹- ضروری چیزوں کا انتظام جیسے پیسے، سفر، پیدا ایٹش کی جگہ، دیگر<br>۱۰- دودھ پلانے کے بارے میں معلومات<br>۱۱- بچوں کے حفاظتی ٹیکوں کے بارے میں معلومات<br>۱۲- نوزائیدہ بچے کو جو خطرات ہوتے ہیں<br>۱۳- بچوں کو کتنے حفاظتی ٹیکے لگنے چاہیے<br>۱۴- نوزائیدہ بچے کی بنیادی ضروریات<br>۱۵- پیدا ایٹش کے بعد فیملی پلیننگ کی اہمیت<br>۱۶- فیملی پلیننگ حاصل کرنے کی جگہ<br>۱۷- پیدا ایٹش کے بعد ڈاکٹری دوروں کی کم از کم تعداد<br>۱۸- پیدا ایٹش کے بعد ڈاکٹری دوروں کا وقت<br>۱۹- پیدائش کے بعد کی پیچیدگیوں کی شناخت<br>۲۰- پیدا ایٹش کے بعد کے خطرات کا مشورہ<br>دیگر، وضاحت کریں<br>_____-۱<br>_____-۲<br>_____-۳ | 67 پیغامات کے ذریعہ MSS نے آپ کو کس قسم کی معلومات دی تھی؟<br>[ایک سے زیادہ جوابات منتخب کر سکتے ہیں]                                                                                                        | 67 |

|                                                                                               |                                                                                                          |                                                                                                                                                                                                                                                       |             |
|-----------------------------------------------------------------------------------------------|----------------------------------------------------------------------------------------------------------|-------------------------------------------------------------------------------------------------------------------------------------------------------------------------------------------------------------------------------------------------------|-------------|
|                                                                                               |                                                                                                          | ۴-_____                                                                                                                                                                                                                                               |             |
| 68                                                                                            | کیا آپ MSS کی فراہم کردہ معلومات سے مطمئن ہیں؟                                                           | ۱- مکمل طور پر غیر مطمئن<br>۲- کچھ حد تک غیر مطمئن<br>۳- نہ مطمئن نہ غیر مطمئن<br>۴- کچھ حد تک مطمئن<br>۵- مکمل طور پر مطمئن                                                                                                                          |             |
| 69                                                                                            | MSS کی فراہم کردہ معلومات کتنی کارآمد تھی؟                                                               | ۱- انتہائی کارآمد<br>۲- کچھ حد تک کارآمد<br>۳- نہ کارآمد نہ غیر کارآمد<br>۴- کچھ حد تک غیر کارآمد<br>۵- انتہائی غیر کارآمد                                                                                                                            |             |
| اب میں آپ سے ان تحریری پیغامات کے بارے میں پوچھوں گی جو آپ نے اپنے حمل کے دوران موصول کیے تھے |                                                                                                          |                                                                                                                                                                                                                                                       |             |
| 70                                                                                            | کیا آپ نے گزشتہ حمل کے دوران یا آخری زچگی کے بعد 42 دن کے اندر MSS سے کوئی تحریری پیغامات موصول کیے ہیں؟ | [1] ہاں<br>[2] نہیں                                                                                                                                                                                                                                   | ← 80 پوچھیں |
| 71                                                                                            | آپ نے کتنے پیغامات موصول کیے؟                                                                            | پیغامات کی تعداد<br>[98] یاد نہیں                                                                                                                                                                                                                     |             |
| 72                                                                                            | پیغامات کس زبان میں تھے؟                                                                                 | [1] اُردو<br>[2] انگریزی<br>[3] پنجابی<br>[4] سرائیکی<br>[5] سندھی                                                                                                                                                                                    |             |
| 73                                                                                            | کیا پیغامات کو سمجھنا آسان تھا؟                                                                          | [1] ہاں<br>[2] نہیں                                                                                                                                                                                                                                   |             |
| 74                                                                                            | کیا MSS نے آپ کو ان اوقات پر پیغامات بھیجے تھے جن میں آپ کے لیے ان کو پڑھنا آسان تھا؟                    | [1] ہاں<br>[2] نہیں                                                                                                                                                                                                                                   | ← 76 پوچھیں |
| 75                                                                                            | اگر نہیں تو پھر کس وقت آپ کو پیغامات بھیجنے چاہیے تھے؟                                                   | وقت _____ : _____                                                                                                                                                                                                                                     |             |
| 76                                                                                            | کیا MSS کے مندرجہ ذیل اعمال سے آپ آرام دہ تھیں؟                                                          | ہاں<br>نہیں                                                                                                                                                                                                                                           |             |
|                                                                                               |                                                                                                          | پیغامات کے اوقات ۲ ۱<br>پیغامات کا دورانیہ ۲ ۱<br>پیغامات کی زبان ۲ ۱<br>پیغامات کی تعداد ۲ ۱                                                                                                                                                         |             |
| 77                                                                                            | پیغامات کے ذریعہ MSS نے آپ کو کس قسم کی معلومات دی تھی؟<br>[ایک سے زیادہ جوابات منتخب کر سکتے ہیں]       | ۱- حمل کے دوران ڈاکٹری دوروں کی کم از کم تعداد<br>۲- حمل کے دوران ڈاکٹری دوروں کا وقت<br>۳- تنبیج کے ٹیکوں کی تعداد حمل کے دوران<br>۴- حمل کے دوران غزائیت سپلنٹ کے بارے میں معلومات<br>۵- برے حمل کے علامات<br>۶- برے حمل کی صورت میں کیا کرنا چاہیے |             |

|                                                                                                |                                                                                                                                                                                                                                                                                                                                                                                                                                                                                                                                                                                                                                                                                                                                                                                                          |                                                                                                         |  |
|------------------------------------------------------------------------------------------------|----------------------------------------------------------------------------------------------------------------------------------------------------------------------------------------------------------------------------------------------------------------------------------------------------------------------------------------------------------------------------------------------------------------------------------------------------------------------------------------------------------------------------------------------------------------------------------------------------------------------------------------------------------------------------------------------------------------------------------------------------------------------------------------------------------|---------------------------------------------------------------------------------------------------------|--|
|                                                                                                | <p>۷- حمل کے دوران ایمر جنسی کی صورت میں کیا کرنا چاہیے؟</p> <p>۸- کیسے اور کب پیدائش کے لیے تیاری کرنی چاہیے</p> <p>۹- ضروری چیزوں کا انتظام جیسے پیسے، سفر، پیدائش کی جگہ، دیگر</p> <p>۱۰- دودھ پلانے کے بارے میں معلومات</p> <p>۱۱- بچوں کے حفاظتی ٹیکوں کے بارے میں معلومات</p> <p>۱۲- نوزائیدہ بچے کو جو خطرات ہوتے ہیں</p> <p>۱۳- بچوں کو کتنے حفاظتی ٹیکے لگنے چاہیے</p> <p>۱۴- نوزائیدہ بچے کی بنیادی ضروریات</p> <p>۱۵- پیدائش کے بعد فیملی پلیننگ کی اہمیت</p> <p>۱۶- فیملی پلیننگ حاصل کرنے کی جگہ</p> <p>۱۷- پیدائش کے بعد ڈاکٹری دوروں کی کم از کم تعداد</p> <p>۱۸- پیدائش کے بعد ڈاکٹری دوروں کا وقت</p> <p>۱۹- پیدائش کے بعد کی پیچیدگیوں کی شناخت</p> <p>۲۰- پیدائش کے بعد کے خطرات کا مشورہ</p> <p>دیگر، وضاحت کریں</p> <p>_____ -۱</p> <p>_____ -۲</p> <p>_____ -۳</p> <p>_____ -۴</p> |                                                                                                         |  |
|                                                                                                | <p>۱- مکمل طور پر غیر مطمئن</p> <p>۲- کچھ حد تک غیر مطمئن</p> <p>۳- نہ مطمئن نہ غیر مطمئن</p> <p>۴- کچھ حد تک مطمئن</p> <p>۵- مکمل طور پر مطمئن</p>                                                                                                                                                                                                                                                                                                                                                                                                                                                                                                                                                                                                                                                      | <p>78 کیا آپ MSS کی فراہم کردہ معلومات سے مطمئن ہیں؟</p>                                                |  |
|                                                                                                | <p>۱- انتہائی کارآمد</p> <p>۲- کچھ حد تک کارآمد</p> <p>۳- نہ کارآمد نہ غیر کارآمد</p> <p>۴- کچھ حد تک غیر کارآمد</p> <p>۵- انتہائی غیر کارآمد</p>                                                                                                                                                                                                                                                                                                                                                                                                                                                                                                                                                                                                                                                        | <p>79 MSS کی فراہم کردہ معلومات کتنی کارآمد تھی؟</p>                                                    |  |
| <p>اب میں آپ سے اُن کا لڑکے کے بارے میں پوچھوں گی جو آپ نے اپنے حمل کے دوران موصول کیے تھے</p> |                                                                                                                                                                                                                                                                                                                                                                                                                                                                                                                                                                                                                                                                                                                                                                                                          |                                                                                                         |  |
| <p>← 91 پوچھیں</p>                                                                             | <p>[1] ہاں</p> <p>[2] نہیں</p>                                                                                                                                                                                                                                                                                                                                                                                                                                                                                                                                                                                                                                                                                                                                                                           | <p>80 کیا آپ نے گزشتہ حمل کے دوران یا آخری زچگی کے بعد 42 دن کے اندر MSS سے کوئی کال موصول کیے ہیں؟</p> |  |
|                                                                                                | <p>پیشگامات کی تعداد</p> <p>[98] یاد نہیں</p>                                                                                                                                                                                                                                                                                                                                                                                                                                                                                                                                                                                                                                                                                                                                                            | <p>81 آپ نے کتنی کالز موصول کی ہیں؟</p>                                                                 |  |

|    |                                                                                                |                                                                                                                                                                                                                                                                                                                                                                                                                                                                                                                                                                                                                                                                                                                                                                                                                                                                                                              |
|----|------------------------------------------------------------------------------------------------|--------------------------------------------------------------------------------------------------------------------------------------------------------------------------------------------------------------------------------------------------------------------------------------------------------------------------------------------------------------------------------------------------------------------------------------------------------------------------------------------------------------------------------------------------------------------------------------------------------------------------------------------------------------------------------------------------------------------------------------------------------------------------------------------------------------------------------------------------------------------------------------------------------------|
| 82 | کال سینٹر کے نمائندہ نے کس زبان میں بات کی تھی؟                                                | [1] اُردو<br>[2] انگریزی<br>[3] پنجابی<br>[4] سرائیکی<br>[5] سندھی                                                                                                                                                                                                                                                                                                                                                                                                                                                                                                                                                                                                                                                                                                                                                                                                                                           |
| 83 | کیا MSS نے آپ کو اُن اوقات پر کال کی تھی جن میں آپ کے لیے بات کرنا آسان تھا؟                   | [1] ہاں<br>[2] نہیں                                                                                                                                                                                                                                                                                                                                                                                                                                                                                                                                                                                                                                                                                                                                                                                                                                                                                          |
| 84 | اگر نہیں تو پھر کس وقت آپ کو کال کرنی چاہیے تھی؟                                               | وقت ___:___                                                                                                                                                                                                                                                                                                                                                                                                                                                                                                                                                                                                                                                                                                                                                                                                                                                                                                  |
| 85 | کیا MSS کے مندرجہ ذیل اعمال سے آپ آرام دہ تھیں؟                                                | ہاں<br>نہیں                                                                                                                                                                                                                                                                                                                                                                                                                                                                                                                                                                                                                                                                                                                                                                                                                                                                                                  |
|    |                                                                                                | فون کال کے اوقات ۲ ۱<br>فون کال کا دورانیہ ۲ ۱<br>کال کی زبان ۲ ۱<br>فون کال کی تعداد ۲ ۱                                                                                                                                                                                                                                                                                                                                                                                                                                                                                                                                                                                                                                                                                                                                                                                                                    |
| 86 | کال کے ذریعہ MSS نے آپ کو کس قسم کی معلومات دی تھی؟<br>[ایک سے زیادہ جوابات منتخب کر سکتے ہیں] | ۱- حمل کے دوران ڈاکٹری دوروں کی کم از کم تعداد<br>۲- حمل کے دوران ڈاکٹری دوروں کا وقت<br>۳- تشخ کے ٹیکوں کی تعداد حمل کے دوران<br>۴- حمل کے دوران غزائیت سپلنٹ کے بارے میں معلومات<br>۵- برے حمل کے علامات<br>۶- برے حمل کی صورت میں کیا کرنا چاہیے<br>۷- حمل کے دوران ایمر جنسی کی صورت میں کیا کرنا چاہیے؟<br>۸- کیسے اور کب پیدائش کے لیے تیاری کرنی چاہیے<br>۹- ضروری چیزوں کا انتظام جیسے پیسے، سفر، پیدائش کی جگہ، دیگر<br>۱۰- دودھ پلانے کے بارے میں معلومات<br>۱۱- بچوں کے حفاظتی ٹیکوں کے بارے میں معلومات<br>۱۲- نوزائیدہ بچے کو جو خطرات ہوتے ہیں<br>۱۳- بچوں کو کتنے حفاظتی ٹیکے لگنے چاہیے<br>۱۴- نوزائیدہ بچے کی بنیادی ضروریات<br>۱۵- پیدائش کے بعد فیملی پلیننگ کی اہمیت<br>۱۶- فیملی پلیننگ حاصل کرنے کی جگہ<br>۱۷- پیدائش کے بعد ڈاکٹری دوروں کی کم از کم تعداد<br>۱۸- پیدائش کے بعد ڈاکٹری دوروں کا وقت<br>۱۹- پیدائش کے بعد کی پیچیدگیوں کی شناخت<br>۲۰- پیدائش کے بعد کے خطرات کا مشورہ |

|                                                                                        |                                                                                                                                                                                                                                                                                                                                                       |  |             |
|----------------------------------------------------------------------------------------|-------------------------------------------------------------------------------------------------------------------------------------------------------------------------------------------------------------------------------------------------------------------------------------------------------------------------------------------------------|--|-------------|
|                                                                                        | دیگر، وضاحت کریں<br>-۱<br>-۲<br>-۳<br>-۴                                                                                                                                                                                                                                                                                                              |  |             |
| 87                                                                                     | کیا آپ MSS کی فراہم کردہ معلومات سے مطمئن ہیں؟<br>۱- مکمل طور پر غیر مطمئن<br>۲- کچھ حد تک غیر مطمئن<br>۳- نہ مطمئن نہ غیر مطمئن<br>۴- کچھ حد تک مطمئن<br>۵- مکمل طور پر مطمئن                                                                                                                                                                        |  |             |
| 88                                                                                     | کیا آپ MSS کے کال سینٹر کے نمائندہ کے رویے سے مطمئن تھیں؟<br>۱- انتہائی کارآمد<br>۲- کچھ حد تک کارآمد<br>۳- نہ کارآمد نہ غیر کارآمد<br>۴- کچھ حد تک غیر کارآمد<br>۵- انتہائی غیر کارآمد                                                                                                                                                               |  |             |
| 89                                                                                     | کیا آپ MSS کے کال سینٹر کا نمائندہ آپ کے مژلات کو سمجھ پایا تھا؟<br>[1] ہاں<br>[2] نہیں                                                                                                                                                                                                                                                               |  |             |
| 90                                                                                     | کیا آپ MSS کی فراہم کردہ معلومات کتنی کارآمد تھی؟<br>۱- انتہائی کارآمد<br>۲- کچھ حد تک کارآمد<br>۳- نہ کارآمد نہ غیر کارآمد<br>۴- کچھ حد تک غیر کارآمد<br>۵- انتہائی غیر کارآمد                                                                                                                                                                       |  |             |
| اب میں آپ سے کالز، تحریری پیغامات اور صوتی پیغامات کے پورے تجربے کے بارے میں پوچھوں گی |                                                                                                                                                                                                                                                                                                                                                       |  |             |
| 91                                                                                     | کیا چیزیں سیکھنا آسان تھیں؟<br>[1] ہاں<br>[2] نہیں                                                                                                                                                                                                                                                                                                    |  |             |
| 92                                                                                     | [پوچھیں کہ جواب دہندہ نے تحریری اور صوتی پیغامات موصول کیے تھے، اگر نہیں تو سوال نمبر 435 پوچھیں]<br>کچھ عورتوں نے تحریری اور صوتی پیغامات موصول کیے تھے۔ ان پیغامات کے ذریعہ عورتیں مخصوص معلومات حاصل کر سکتی ہیں ان پیغامات کا جواب دے کر۔ تو کیا آپ بھی جواب دینے کی سہولت کا استعمال کر کے نمائندہ سے بات کرنا چاہیں گیں؟<br>[1] ہاں<br>[2] نہیں |  |             |
| 93                                                                                     | اگر آپ کسی اور ذریعے سے معلومات حاصل کر سکتیں تو آپ کونسا ذریعہ پسند کرتیں؟<br>[ایک سے زیادہ جوابات منتخب کر سکتے ہیں]<br>۱- تحریری پیغام<br>۲- صوتی پیغام<br>۳- فون کال<br>۴- کوئی بھی نہیں                                                                                                                                                          |  |             |
| 94                                                                                     | کیا آپ کے پاس کوئی مشورے ہیں ہمارے پروگرام کیلئے؟<br>[1] ہاں<br>[2] نہیں                                                                                                                                                                                                                                                                              |  | ← 96 پوچھیں |

|                     |                                                                                                                                                                                                                                                                                                                          |                                                                          |     |
|---------------------|--------------------------------------------------------------------------------------------------------------------------------------------------------------------------------------------------------------------------------------------------------------------------------------------------------------------------|--------------------------------------------------------------------------|-----|
|                     | <p>_____ -۱</p> <p>_____ -۲</p> <p>_____ -۳</p> <p>_____ -۴</p>                                                                                                                                                                                                                                                          | <p>اگر ہاں، تو آپ کیا مشورہ دینا چاہیں گے؟</p>                           | 95  |
| <p>← 100 پوچھیں</p> | <p>[1] ہاں</p> <p>[2] نہیں</p>                                                                                                                                                                                                                                                                                           | <p>کیا اس تحقیق میں شمولیت کرنے سے آپ کو کوئی بُرا تجربہ ہوا؟</p>        | 96  |
|                     | <p>[1] ڈرایا اور ہتھیار کا استعمال کیا</p> <p>[2] تھپڑ مارا، دھکا، کوئی زخم نہیں آیا اور تھوڑی دیر تک رہا</p> <p>[3] مٹکا، گھوسا مارا، خراش آئی، کٹ لگا اور مسلسل درد رہا</p> <p>[4] مارا، گھیرا زخم آیا، جل گیا، ہڈی ٹوٹ گئی</p> <p>[5] سر پر چوٹ آئی، اندرونی چوٹ آئی، زخم پڑ گیا</p> <p>[6] ہتھیار کا استعمال کیا</p> | <p>اگر ہاں، تو کیا ہوا؟</p>                                              | 97  |
|                     | <p>[1] شوہر</p> <p>[2] سرال والوں نے</p> <p>[3] دیگر</p>                                                                                                                                                                                                                                                                 | <p>اگر ہاں، تو کس نے کیا؟</p>                                            | 98  |
|                     | <p>تعداد _____</p>                                                                                                                                                                                                                                                                                                       | <p>کتنی بار ایسا ہوا؟</p>                                                | 99  |
| <p>← 102 پوچھیں</p> | <p>[1] ہاں</p> <p>[2] نہیں</p>                                                                                                                                                                                                                                                                                           | <p>کیا آپ MSS سے مزید مشورات یا معلومات موصول کرنا پسند کریں گے؟</p>     | 100 |
|                     | <p>_____ -۱</p> <p>_____ -۲</p> <p>_____ -۳</p> <p>_____ -۴</p>                                                                                                                                                                                                                                                          | <p>آپ مزید کیا جاننا چاہیں گے؟</p>                                       | 101 |
| <p>← 104 پوچھیں</p> | <p>[1] ہاں</p> <p>[2] نہیں</p>                                                                                                                                                                                                                                                                                           | <p>کیا آپ اپنی دوستوں کو مشورہ دیں گے اس پروگرام میں حصہ لینے کیلئے؟</p> | 102 |
|                     | <p>_____ -۱</p> <p>_____ -۲</p> <p>_____ -۳</p> <p>_____ -۴</p>                                                                                                                                                                                                                                                          | <p>اگر نہیں تو کیوں نہیں؟</p>                                            | 103 |



## سیکشن پانچ: سماجی تعاون

شرکت کنندہ کو پڑھ کر سنائیں: ہم ان لوگوں کے بارے میں جاننا چاہتے ہیں جو آپ کے لئے معاون و مددگار ہیں۔ معاون و مددگار سے مراد وہ شخص ہے جو آپ کی مدد کرے، آپ کی بات سننے یا مشکل میں آپ کا ساتھ دے / آپ کے ساتھ کھڑا ہو۔ ہم ایک ایک کر کے مختلف لوگوں کے حوالے سے سوالات پوچھیں گے۔ آپ کو فیصلہ کرنا ہے کہ وہ شخص یا گروہ آپ کے لئے کس حد تک معاون و مددگار ہے۔

برائے مہربانی متعلقہ جواب پر دائیرہ لگائیں۔

|     |                                                                                                  |                |               |               |
|-----|--------------------------------------------------------------------------------------------------|----------------|---------------|---------------|
| 104 | آپ کے شوہر آج کل آپ کے لیے کس حد تک آپکا ساتھ دیتے ہیں یا آپکی مدد کرتے ہیں؟                     | [0] بالکل نہیں | [1] کچھ حد تک | [2] بہت زیادہ |
| 105 | کیا آپ کا 18 سال سے بڑا کوئی بچہ ہے؟                                                             | [1] ہاں        | [2] نہیں      | ← 107 پوچھیں  |
| 106 | آپ کا بڑا بچہ (یا بچے) آج کل آپ کا کس حد تک ساتھ دیتے ہیں یا مدد کرتے ہیں؟                       | [0] بالکل نہیں | [1] کچھ حد تک | [2] بہت زیادہ |
| 107 | کیا آپ کے والدین (والد / والدہ) حیات [زندہ] ہیں؟                                                 | [1] ہاں        | [2] نہیں      | ← 109 پوچھیں  |
| 108 | آپ کے والدین (والد / والدہ) آج کل آپ کا کس حد تک ساتھ دیتے ہیں یا مدد کرتے ہیں؟                  | [0] بالکل نہیں | [1] کچھ حد تک | [2] بہت زیادہ |
| 109 | کیا آپ کے بہن بھائی ہیں؟                                                                         | [1] ہاں        | [2] نہیں      | ← 111 پوچھیں  |
| 110 | آپ کے بہن بھائی آج کل آپ کا کس حد تک ساتھ دیتے ہیں یا مدد کرتے ہیں؟                              | [0] بالکل نہیں | [1] کچھ حد تک | [2] بہت زیادہ |
| 111 | کیا آپ کے چچا، پھوپھو، ماموں، خالا اور ان کے بچے ہیں؟                                            | [1] ہاں        | [2] نہیں      | ← 113 پوچھیں  |
| 112 | آپ کے چچا، پھوپھو، ماموں، خالا اور ان کے بچے آج کل آپ کا کس حد تک ساتھ دیتے ہیں یا مدد کرتے ہیں؟ | [0] بالکل نہیں | [1] کچھ حد تک | [2] بہت زیادہ |
| 113 | کیا آپ کے سرکاری رشتہ دار ہیں مثلاً ساس، سسر، نند، دیور، جیٹھ؟                                   | [1] ہاں        | [2] نہیں      | ← 115 پوچھیں  |
| 114 | آپ کے سرکاری رشتہ دار آج کل آپ کا کس حد تک ساتھ دیتے ہیں یا مدد کرتے ہیں؟                        | [0] بالکل نہیں | [1] کچھ حد تک | [2] بہت زیادہ |
| 115 | کیا آپ کے (رشتہ داروں کے علاوہ) ہمسائے / پڑوسی ہیں؟                                              | [1] ہاں        | [2] نہیں      | ← 117 پوچھیں  |
| 116 | آپ کے ہمسائے / پڑوسی آج کل کس حد تک آپ کا ساتھ                                                   | [0] بالکل نہیں | [1] کچھ حد تک | [2] بہت زیادہ |

|     |                                                  |                                                                                                                                                 |            |
|-----|--------------------------------------------------|-------------------------------------------------------------------------------------------------------------------------------------------------|------------|
|     |                                                  | دیتے ہیں یا مدد کرتے ہیں؟                                                                                                                       |            |
| 117 | [1] ہاں<br>[2] نہیں                              | کیا کوئی سرکاری یا غیر سرکاری ادارے کی ورکر آپ کے گھر آتی جاتی ہے؟                                                                              | 122 پوچھیں |
| 118 |                                                  | سرکاری یا غیر سرکاری ادارے کی ورکر آج کل آپ کے لئے کس حد تک مدد گار ہے؟<br>ہر ایک کے نام اور عہدے کے ساتھ بتائیں کہ وہ کس حد تک اور مدد گار ہے: |            |
| 119 | [0] بالکل نہیں<br>[1] کچھ حد تک<br>[2] بہت زیادہ | نام اور عہدہ 1:                                                                                                                                 |            |
| 120 | [0] بالکل نہیں<br>[1] کچھ حد تک<br>[2] بہت زیادہ | نام اور عہدہ 2:                                                                                                                                 |            |
| 121 | [0] بالکل نہیں<br>[1] کچھ حد تک<br>[2] بہت زیادہ | نام اور عہدہ 3:                                                                                                                                 |            |
| 122 | [1] ہاں<br>[2] نہیں                              | کیا آپ کسی مقامی فلاحی کمیٹی / مذہبی مجالس کا حصہ ہیں؟                                                                                          | 124 پوچھیں |
| 123 | [0] بالکل نہیں<br>[1] کچھ حد تک<br>[2] بہت زیادہ | مقامی فلاحی کمیٹی / مذہبی مجالس کے افراد آج کل آپ کے لیے کس حد تک معاون اور مدد گار ہیں؟                                                        |            |
| 124 | [1] ہاں<br>[2] نہیں                              | کیا آپ کی دوست یا سہیلیاں ہیں؟                                                                                                                  | 126 پوچھیں |
| 125 | [0] بالکل نہیں<br>[1] کچھ حد تک<br>[2] بہت زیادہ | آپ کی دوست یا سہیلیاں آج کل آپ کی کس حد تک مدد کرتی ہیں یا ساتھ دیتی ہیں؟                                                                       |            |
| 126 | [1] ہاں<br>[2] نہیں                              | کیا آپ کے پاس کوئی ایک ایسا خاص شخص ہے جس پر آپ بھروسہ کر سکیں اور اسے اپنے ذاتی مسائل بتا سکیں؟                                                | 128 پوچھیں |
| 127 |                                                  | اگر ہاں تو اوپر بتائے گئے لوگوں میں سے وہ شخص کون ہے؟<br>رشتہ:                                                                                  |            |

### سیکشن چھ: گھریلو تشدد

اضطراب کو روکنے والے کے لیے ہدایات: معائنہ کریں کہ جس جگہ آپ بیٹھی ہیں یا آپ کے پاس کی جگہیں جہاں آپ کی آواز پہنچ سکتی ہو، وہاں کوئی اور موجود نہ ہو۔ رازداری کو برقرار رکھنے کے لیے اس بات کی یقین دہانی کریں کہ کوئی بھی فرد اتنے قریب نہ ہو کہ وہ آپ کے سوال و جواب کو سن سکے۔ اگر آس پاس اس عمر کے بچے ہیں جو آپ کی باتوں کو سمجھنے کی صلاحیت رکھتے ہیں، انہیں شائستگی سے جانے کا کہیں۔ صرف چھوٹے بچے جو آپ کی باتوں کو سمجھنے کے قابل ناہوں، وہ بات چیت کے دوران آپ کے ہمراہ رہ سکتے ہیں۔ اُس وقت تک سوالات نہ پوچھیں، جب تک اس بات کی یقین دہانی نہ کر لیں کہ آپ کے آس پاس کوئی نہیں ہے۔ اس معلومات کی اہمیت کو نظر انداز نہیں کیا جاسکتا، آپ کو رازداری رکھنے کے لیے ہر وہ عمل کرنا ہے جس کے بعد آپ سوال و جواب شروع کر سکیں۔ اگر آپ رازداری کو برقرار رکھنے میں ناکام رہیں گی تو بہت سی اہم معلومات حاصل نہیں کر پائیں گی۔

جو ابد ہندہ کے لیے پڑھیے: اب میں آپ سے خواتین کی زندگی کے کچھ اہم پہلوؤں کے بارے میں سوالات کرنا چاہتی ہوں۔ ہو سکتا ہے ان میں سے کچھ سوالات آپ کو بہت ہی

ذاتی نوعیت کے لگیں۔ تاہم آپ کے جوابات پاکستان میں موجود خواتین کے حالات کو سمجھنے میں بے انتہا مددگار ثابت ہوں گے۔ میں آپ کو اس بات کی یقین دہانی کرواتی ہوں کہ آپ کے جوابات مکمل طور پر خفیہ رکھے جائیں گے اور ان کا ذکر کسی سے نہیں کیا جائے گا اور آپ کے گھر آنے میں کسی کو یہ نہیں معلوم ہو گا کہ آپ سے کس قسم کے سوالات پوچھے گئے ہیں۔

|     |                                                                                                                                       |                                                                                                                                                                            |            |
|-----|---------------------------------------------------------------------------------------------------------------------------------------|----------------------------------------------------------------------------------------------------------------------------------------------------------------------------|------------|
| 128 | کیا آپ کو کبھی بھی اپنے شوہر یا قریبی عزیز کی طرف سے جسمانی یا جذباتی تشدد کا نشانہ بنایا گیا؟                                        | [1] ہاں<br>[2] نہیں                                                                                                                                                        | 132 پوچھیں |
| 129 | گزشتہ 6 ماہ کے دوران، آپ کو کسی نے مارا، تھپڑ مارا، ٹھوکا مارا یا کوئی جسمانی تشدد کیا؟                                               | [1] ہاں<br>[2] نہیں                                                                                                                                                        | 132 پوچھیں |
| 130 | اگر ہاں، تو کس نے؟                                                                                                                    | [1] شوہر<br>[2] سسرال<br>[3] کوئی اور                                                                                                                                      |            |
| 131 | کتنی دفعہ تشدد کیا؟                                                                                                                   | تعداد                                                                                                                                                                      |            |
| 132 | جب سے آپ حاملہ ہوئی، آپ کو کسی نے مارا، تھپڑ مارا، ٹھوکا مارا یا کوئی جسمانی تشدد کیا؟                                                | [1] ہاں<br>[2] نہیں                                                                                                                                                        | 138 پوچھیں |
| 133 | اگر ہاں، تو کس نے؟                                                                                                                    | [1] شوہر<br>[2] سسرال<br>[3] کوئی اور                                                                                                                                      |            |
| 134 | کتنی دفعہ تشدد کیا؟                                                                                                                   | تعداد                                                                                                                                                                      |            |
| 135 | آپ کے جسم کے کس حصے پر سب سے زیادہ تشدد کیا گیا؟<br>[صرف ایک جواب ممکن ہے، ایک سے زیادہ جواب آنے کی صورت میں سب سے اہم جواب نوٹ کریں] | [1] سر پر<br>[2] چہرے پر<br>[3] چھاتی / سینہ پر<br>[4] پیٹ پر<br>[5] پیٹھ پر / کمر کے اوپری حصہ پر<br>[6] پشت پر، کمر کے نچلے / جسم کے پچھلے حصہ پر<br>[7] ٹانگ / گھٹنے پر |            |
| 136 | تشدد کس طرح کیا گیا یعنی تشدد کے لئے کس قسم کا اوزار / ہتھیار کا استعمال کیا گیا؟                                                     | [1] ہاتھ / پیر کا استعمال کیا<br>[2] ہتھیار کا استعمال جیسے چھری / لکڑی / برتن / ڈنڈا / پائپ وغیرہ<br>دیگر (وضاحت کریں)                                                    |            |
| 137 | تشدد کی نوعیت کیا تھی یعنی، کیا تشدد کرنے سے:                                                                                         | ہاں<br>نہیں                                                                                                                                                                |            |
|     | [1] چوٹ یا تھوڑے وقت تک درد رہا۔                                                                                                      | 1                                                                                                                                                                          | 2          |
|     | [2] زخم، کٹ پڑ گیا یا مسلسل درد رہا۔                                                                                                  | 1                                                                                                                                                                          | 2          |
|     | [3] اگر زخم جس سے خون آیا یا ہڈی ٹوٹ گئی۔                                                                                             | 1                                                                                                                                                                          | 2          |
|     | [4] اندرونی چوٹ، مستقل چوٹ رہی۔                                                                                                       | 1                                                                                                                                                                          | 2          |
| 138 | گزشتہ 6 ماہ کے دوران، کبھی آپ کے شوہر نے آپ کو زبردستی جسمانی تعلق قائم کرنے کے لیے زور دیا؟                                          | [1] ہاں<br>[2] نہیں                                                                                                                                                        | 140 پوچھیں |
| 139 | کتنی دفعہ تشدد کیا؟                                                                                                                   | تعداد                                                                                                                                                                      |            |

|  |                    |         |                                     |     |
|--|--------------------|---------|-------------------------------------|-----|
|  | [2] نہیں           | [1] ہاں | کیا آپ اپنے شوہر سے خوفزدہ رہتے ہو؟ | 140 |
|  | آپ کے وقت کا شکریہ |         |                                     |     |
